1 The transcriptional landscape of cortical interneurons underlies *in-vivo* brain function and schizophrenia  
2 risk

3  
4 Kevin M Anderson<sup>1</sup>, Meghan A Collins<sup>1</sup>, Rowena Chin<sup>1</sup>, Tian Ge<sup>2,3</sup>, Monica D Rosenberg<sup>1</sup>, Avram J  
5 Holmes<sup>1,3,4\*</sup>

6  
7 <sup>1</sup>Department of Psychology, Yale University, New Haven, Connecticut 06520

8 <sup>2</sup>Psychiatric and Neurodevelopmental Genetics Unit, Center for Genomic Medicine, Massachusetts  
9 General Hospital, Boston, MA 02114, USA

10 <sup>3</sup>Department of Psychiatry, Massachusetts General Hospital, Harvard Medical School,  
11 Boston, MA 02114, USA

12 <sup>4</sup>Department of Psychiatry, Yale University, New Haven, Connecticut 06520, USA

13 \*Corresponding author.

14  
15 **Author contributions.** KMA and AJH designed the research. KMA conducted the research. MAC, RC,  
16 MDR, TG provided analytic support. KMA and AJH wrote the manuscript and made figures. All authors  
17 edited the manuscript.

18  
19 **Acknowledgements:** This work was supported by the National Institute of Mental Health (Grant  
20 K01MH099232 to A.J.H.), the National Science Foundation (DGE-1122492 to K.M.A.), and the National  
21 Institute on Aging (K99AG054573 to T.G.). Analyses were made possible by the high-performance  
22 computing facilities provided through the Yale Center for Research Computing. We thank B.J. Casey,  
23 Danielle Gerhard, Lauren Patrick, and Erica Ho for their feedback on early versions of the project. This  
24 work used data from the Allen Institute for Brain Science, NIH Blueprint Non-Human Primate Atlas,  
25 CommonMind Consortium, Brainspan Atlas of the Developing Human Brain, and has been conducted  
26 using the UK Biobank Resource under Application Number 25163. The Genotype-Tissue Expression  
27 (GTEx) Project was supported by the Common Fund of the Office of the Director of the National Institutes  
28 of Health, and by NCI, NHGRI, NHLBI, NIDA, NIMH, and NINDS. The data used for the analyses  
29 described in this manuscript were obtained from the GTEx Portal on 01/16/2018.

30  
31 **Correspondence:** Avram J. Holmes, Yale University, Department of Psychology, 402 Sheffield Sterling  
32 Strathcona Hall, 1 Prospect Street, New Haven, CT 06511, Phone: 203-436-9240, Email:  
33 avram.holmes@yale.edu.

34  
35 **Classification:** Biological Sciences: Neuroscience

36  
37 **Keywords:** fMRI, interneuron, genetics, somatostatin, parvalbumin, schizophrenia

38

### Abstract

39

40

41

42

43

44

45

46

47

48

49

50

51

52

Inhibitory interneurons orchestrate information flow across cortex and are implicated in psychiatric illness. Although classes of interneurons have unique functional properties and spatial distributions throughout the brain, the relative influence of interneuron subtypes on brain function, cortical specialization, and illness risk remains elusive. Here, we demonstrate stereotyped organizational properties of somatostatin and parvalbumin related transcripts within human and non-human primates. Interneuron spatial distributions recapitulate cortico-striato-thalamic functional networks and track regional differences in functional MRI signal amplitude. In the general population (n=9,627), parvalbumin-linked genes account for an enriched proportion of genome-wide heritable variance in *in-vivo* functional MRI signal amplitude. This relationship is spatially dependent, following the topographic organization of parvalbumin expression in independent post-mortem brain tissue. Finally, genetic risk for schizophrenia is enriched among interneuron-linked genes and predictive of cortical signal amplitude in parvalbumin-biased regions. These data indicate that the molecular genetic basis of resting-state brain function across cortex is shaped by the spatial distribution of interneuron-related transcripts and underlies individual differences in risk for schizophrenia.

53

### Key Findings

- 54 1. Spatial distributions of somatostatin (*SST*) and parvalbumin (*PVALB*) are negatively correlated in  
55 mature human and non-human primate cortex, paralleling patterns observed *in utero*.
- 56 2. *SST* and *PVALB* are differentially expressed within distinct limbic and somato/motor cortico-  
57 striato-thalamic networks, respectively.
- 58 3. *In-vivo* resting-state signal amplitude is heritable in the general population and tracks relative  
59 *SST/PVALB* expression across cortex.
- 60 4. Single-nucleotide polymorphisms tied to *PVALB*-related genes account for an enriched proportion  
61 of the heritable variance in resting-state signal amplitude.
- 62 5. *PVALB*-mediated heritability of resting-state signal amplitude in the general population is spatially  
63 heterogeneous, mirroring the cortical expression of *PVALB* in independent post-mortem brain  
64 tissue.
- 65 6. Polygenic risk for schizophrenia is enriched among interneuron-linked genes and predicts resting-  
66 state signal amplitude in a manner that also follows the cortical expression of *PVALB*.

67 **Introduction**

68 Ramón y Cajal theorized that the functional diversity of the human brain arises, in part, from the  
69 vast assortment of neurons that pattern cortex<sup>1</sup>. Inhibitory interneurons are the most varied neuronal  
70 class<sup>2</sup>, exhibiting divergent morphological and physiological properties and coordinating information flow  
71 across the brain's collective set of functional connections (functional connectome)<sup>3,4</sup>. Foundational cross-  
72 species animal and human work provides converging evidence for the role of interneurons in healthy  
73 brain functions as well as their dysregulation in psychiatric illnesses, including schizophrenia<sup>5,6</sup> and major  
74 depressive disorder<sup>7</sup>. The development of densely sampled gene transcriptional atlases now enables the  
75 study of cellular and molecular correlates of functional brain network architecture<sup>8-11</sup>. Despite these  
76 methodological advances and a clear role for interneurons in the modulation of excitatory neuron activity,  
77 relatively little is known about how the spatial distribution of interneuron subtypes shape human brain  
78 activity and associated risk for psychiatric illness.

79 The topographic distribution of interneuron subtypes is theorized to contribute to regional and  
80 functional network specialization, partly by altering the relative excitatory/inhibitory balance within a given  
81 patch of cortex<sup>9,12,13</sup>. Interneurons comprise approximately 20-30% of cortical neurons<sup>14</sup> and form  
82 stereotyped microcircuits with excitatory projection neurons<sup>15</sup>. While the precise number of interneuron  
83 subtypes is under debate, the vast majority express one of a limited set of genetic markers: somatostatin  
84 (*SST*), parvalbumin (*PVALB*), and vasoactive-intestinal peptide (*VIP*; a subset of *HTR3A* interneurons)<sup>2</sup>.  
85 Each molecular subtype possesses unique synaptic and functional characteristics, leading to the  
86 hypothesis that the ratio of specific interneuron classes may drive local differences in neural activity. For  
87 example, *SST* expressing interneurons preferentially target dendrites of cortical projection neurons to  
88 regulate input whereas *PVALB* expressing interneurons primarily synapse on perisomatic regions to  
89 regulate output<sup>2,16</sup>. Consequently, the increased presence of *SST*, relative to other classes of  
90 interneurons, may facilitate filtering of noisy or task-irrelevant cortical signals as well as increase recurrent  
91 excitation required for higher-order cognition<sup>20</sup>. Conversely, relative increases in *PVALB* may produce  
92 stronger feedback inhibition on excitatory neurons<sup>13</sup>, leading to shorter activation timescales<sup>17</sup> suited for  
93 processing constantly changing sensorimotor stimuli. These collective results suggest that the spatial  
94 distribution of interneuron subtypes could underlie regional differences in temporal signaling across  
95 cortex, as indexed by blood oxygenation level-dependent (BOLD) functional magnetic resonance imaging  
96 (fMRI).

97 Establishing the organizational principles by which cellular diversity influences brain function is a  
98 long-standing challenge in neuroscience, and could provide a route to understand individual variability in  
99 the diverse processing capabilities of the human brain across health and disease. Consistent with this  
100 aim, recent translational work suggests a core role of *PVALB* interneurons in the biological basis of fMRI  
101 measures of *in-vivo* brain function<sup>18</sup>. *PVALB* interneurons are known to orchestrate gamma-band  
102 oscillations (30-80 Hz<sup>19,20</sup>), a frequency range that is tightly coupled to spontaneous BOLD fluctuations<sup>21-</sup>  
103 <sup>25</sup>. Optogenetic stimulation of *PVALB* interneurons in rodents drives rhythms in the gamma range,

104 impacting information processing through the synchronization of excitatory neurons<sup>20</sup>. In psychiatric  
105 illness, several lines of evidence suggest that decreased PVALB-mediated inhibition may serve as a core  
106 locus of disruption in schizophrenia, giving rise to the altered gamma-band signal and working memory  
107 deficits observed in the disorder<sup>26</sup>. However, a direct link between PVALB-related genetic variation and  
108 *in-vivo* brain activity has yet to be established. Linking cortical interneurons to individual differences in  
109 human brain function would yield deep insight into the biological basis of the hemodynamic BOLD signal,  
110 providing an engine for the discovery of functional connectome-linked genes and associated risk for  
111 illness onset.

112         Here, we bridge genetic, transcriptional, and neuroimaging data to advance three related lines of  
113 inquiry linking interneurons to human brain function. First, we describe the principal organizational  
114 features of *SST* and *PVALB* expression in both human and non-human primates, demonstrating a robust  
115 pattern of anti-correlation across cortex. Supporting the hypothesis that interneuron ratios contribute to  
116 functional specialization, *SST* and *PVALB* were differentially expressed within distinct limbic and  
117 somato/motor cortico-striato-thalamic functional loops, respectively. Second, we establish that the relative  
118 density of *SST* and *PVALB* tracks regional differences in brain activity across cortex. In a population-  
119 based sample of 9,627 individuals<sup>27</sup>, genetic variation among *PVALB*-correlated genes accounted for an  
120 enriched proportion of heritable variance in resting-state signal amplitude in a manner that mirrors the  
121 spatial expression of *PVALB* in an independent analysis of post-mortem brain tissue. Critically, these  
122 discoveries suggest that the molecular genetic basis of cortical function is not spatially uniform and that  
123 genes linked to *PVALB* interneurons underlie heritable aspects of the BOLD response. Third, we find  
124 evidence supporting the link between *PVALB* interneurons and psychotic illness, demonstrating that  
125 genetic risk for schizophrenia is enriched among interneuron-linked genes while also predicting reduced  
126 resting-state signal amplitude in a spatially heterogenous manner that follows the cortical expression of  
127 *PVALB*. These data help to address a long-standing challenge of neuroscience to understand how  
128 cytoarchitecture shapes human brain function and related vulnerability for psychiatric illness.

129

## Results

### 130 **Stereotyped anti-correlation of SST and PVALB interneuron markers across cortex**

131 The unique properties of interneuron subtypes emerge early in development and are determined,  
132 in part, by their spatial location of origin in the embryonic ganglionic eminence<sup>28,29</sup>. *VIP* interneurons are  
133 born within the caudal ganglionic eminence (CGE), whereas *SST* and *PVALB* interneurons originate in  
134 the medial ganglionic eminence (MGE) along negatively correlated spatial gradients<sup>30</sup>. Parvalbumin- and  
135 somatostatin-destined neurons differentially cluster within the dorsal and ventral MGE, respectively<sup>31,32</sup>.  
136 Evidence in humans<sup>9,12</sup> and rodents<sup>13</sup> indicates that *SST* and *PVALB* maintain a negative spatial  
137 correlation in adulthood, suggesting that embryonic gradients may constitute a “proto-map” of mature  
138 cortex. Although the functional consequences of a negative spatial *SST/PVALB* relationship are not well  
139 understood, the presence of replicable and evolutionarily conserved expression patterns may suggest the  
140 importance of such interneuron gradients.

141 To characterize interneuron topography across human and non-human primate cortex, we  
142 analyze gene expression data from the Allen Human Brain Atlas (AHBA)<sup>33</sup> and NIH Blueprint Non-Human  
143 Primate (NHP) Atlas<sup>34</sup>. Cortical tissue AHBA samples from the left ( $n=1,273$ ) and right ( $n=428$ )  
144 hemispheres were analyzed. Microarrays do not give absolute estimates of gene transcription, but can  
145 measure within-probe differences across samples. *SST* and *PVALB* expression values were mean and  
146 variance normalized across cortical samples, and subtracted (i.e. *SST-PVALB*) to reveal relative  
147 expression differences (Figure 1a). Extending prior evidence of negative spatial expression relationships  
148 between *SST* and *PVALB*<sup>9,12</sup>, these two transcripts were inversely correlated across available AHBA  
149 cortical samples (Figure 1e;  $r(1,699)=-0.43$ ,  $p<2.2e-16$ ). *SST* and *PVALB* distributions were organized  
150 along an anterior to posterior gradient, with relative *SST* expression greatest in orbitofrontal and medial  
151 prefrontal cortex, anterior insula, anterior cingulate, and the temporal lobe (Figure 1a-c; Supplemental  
152 Figure 1). In contrast, relative *PVALB* expression was greatest within unimodal sensory, motor, and visual  
153 cortices, as well as the parietal lobe. Histologically defined anatomical categories were used to  
154 characterize regional differences of interneuron density (Figure 1c). Median relative expression of *SST*  
155 and *PVALB* was negatively correlated across cortical subregions ( $r(39)=-0.87$ ,  $p=1.0e-13$ ).

156 Suggesting that interneuron spatial gradients are a core organizational feature of primate cortex,  
157 the negative spatial relationship between *SST* and *PVALB* was evolutionarily conserved in non-human  
158 macaque primates across individual samples ( $r(34)=-0.74$ ,  $p\leq 0.001$ ). Given that *SST* and *PVALB*  
159 interneurons originate along a stereotyped, negatively correlated spatial gradient in embryonic ganglionic  
160 eminences<sup>32</sup>, we analyzed RNAseq data from the Brainspan Atlas of the Developing Human Brain to test  
161 whether *SST/PVALB* negative gradients emerge during developmental periods coinciding with major  
162 waves of interneuron colonization, approximately 10-25 post conception weeks (pcw)<sup>35,36</sup>. The negative  
163 correlation between *SST* and *PVALB* was absent in early-fetal (8-12 pcw;  $\beta=0.32$ ,  $p=0.04$ ) and early-  
164 midfetal (13-21 pcw;  $\beta=0.02$ ,  $p=0.85$ ) ages. Consistent with the hypothesis that mature interneuron  
165 distributions result from developmentally programmed migration patterns, we observed significant

166 negative correlations between *SST/PVALB* across late-fetal (24-37 pcw;  $\beta=-0.47$ ,  $p=0.012$ ), early-infancy  
167 (4 months;  $\beta=-0.60$ ,  $p=0.0033$ ), mid-late childhood (8-11yrs;  $\beta=-0.52$ ,  $p=0.0038$ ), and adult (18-40yrs;  $\beta=-$   
168 0.35,  $p=0.0014$ ) age, although not in late infancy (10 months;  $b=-0.37$ ,  $p=0.36$ ), early-childhood (1-4yrs;  
169  $b=-0.11$ ,  $p=0.48$ ), or adolescence (13-15yrs;  $b=-0.54$ ,  $p=0.057$ ). These data provide developmental  
170 context as well as an external replication of the *SST/PVALB* cortical expression pattern observed in the  
171 AHBA (adult human) and NHP Atlas (adult macaque) samples.

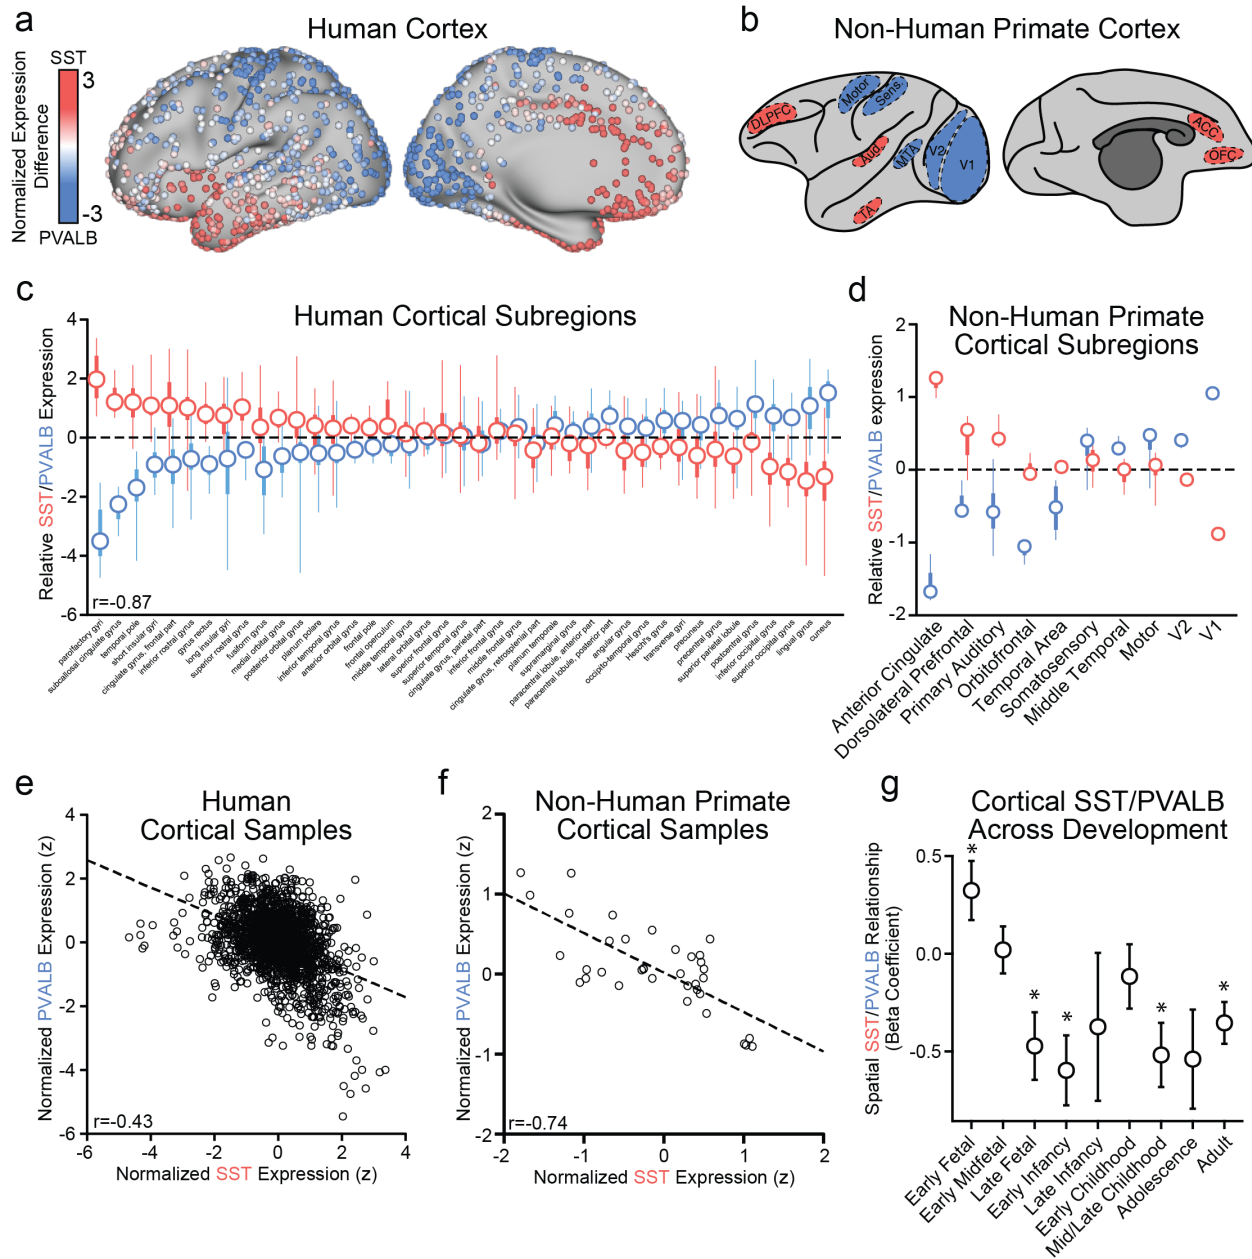

172  
 173 **Fig 1. Cortical expression of SST and PVALB are negatively correlated across species and**  
 174 **developmental stages.** (a) Left-hemisphere AHBA tissue samples mapped to the human cortical  
 175 surface, and (b) an illustration of non-human primate tissue sample locations, colored by relative  
 176 expression of SST (red) and PVALB (blue). Normalized expression difference reflects the sample-wise  
 177 subtraction of mean-normalized PVALB from SST. Relative SST-PVALB expression among anatomically  
 178 defined groups from the (c) AHBA and (d) NIH Blueprint Non-Human Primate Atlas; circles=median,  
 179 thick lines=interquartile range, thin lines=min and max values. (e) Sample-wise negative correlation of SST and  
 180 PVALB in (e) human cortex ( $r=-0.43$ ,  $p \leq 0.001$ ) and (f) non-human primates ( $r=-0.74$ ,  $p \leq 0.001$ ). (g)  
 181 Correlation of cortical SST and PVALB across nine developmental stages using data from the Brainspan  
 182 Atlas of the Developing Human Brain. \* $p \leq 0.05$ , uncorrected; error bars=SE.



183 ***SST* and *PVALB* distinguish limbic and somato/motor cortico-striato-thalamic networks**

184 Spatial patterns of gene expression may recapitulate the architecture of functional networks  
185 across cortex<sup>8,10,37</sup> and mirror functional connectivity between territories with vastly different global  
186 expression profiles (e.g., cortex and striatum<sup>9</sup>). We next examined whether the inverse spatial relationship  
187 between *SST* and *PVALB* is unique to cortex or preserved across subcortex (See Supplemental  
188 Information for subcortical sample information). Sample-wise expression was normalized separately for  
189 each of seven areas: striatum, thalamus, hypothalamus, globus pallidus, amygdala, hippocampus proper  
190 (i.e. CA1-CA4), and combined substantia nigra/ventral tegmentum. A cumulative negative relationship  
191 was observed between *SST* and *PVALB* (Figure 2a;  $r=-0.14$ ), although a wide range of correlation values  
192 were observed (from -0.71 through 0.29). To demonstrate that the observed overall negative correlation  
193 between *SST* and *PVALB* is not obligated by global transcriptional properties, we display the distribution  
194 of averaged correlations, collapsed across cortex and the seven subcortical areas, of every gene to *SST*  
195 and to *PVALB*. Figure 2b demonstrates that *SST* is among the most negatively correlated genes to  
196 *PVALB* (bottom 0.014% of distribution), across all regions. Similarly, *PVALB* is among the most negatively  
197 correlated genes to *SST* (bottom 0.0012% of distribution). See Supplemental Figure 2 for *SST* and  
198 *PVALB* expression across subcortical subregions.

199

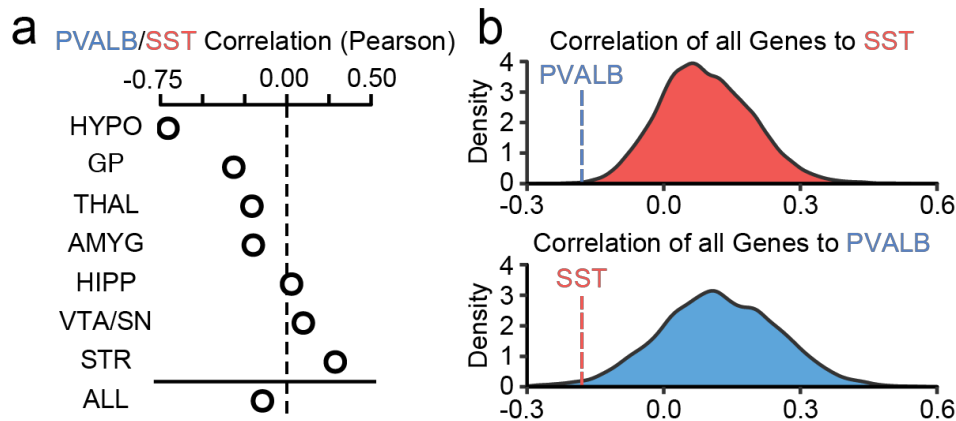

200

201 **Figure 2. SST and PVALB are among the most negatively correlated transcripts to one another. (a)**

202 Overall, *SST* and *PVALB* are negatively correlated in subcortical regions ( $r=-0.14$ ), but this relationship is

203 variable (range  $-0.71-0.29$ ). (b) The spatial correlation between *SST* and *PVALB* was averaged across

204 cortex and the seven analyzed subcortical regions. Compared to all genes, *SST* and *PVALB* are among

205 the most negatively correlated genes to one another. *PVALB* is among the top 0.0012% most negatively

206 correlated genes to *SST* (top panel), and *SST* is among the top 0.014% most negatively correlated genes

207 to *PVALB* (bottom panel). HYPO=hypothalamus, GP=Globus Pallidus, THAL=thalamus,

208 AMYG=amygdala, HIPP=hippocampus, VTA/SN=ventral tegmental area/substantia nigra, STR=striatum,

209 ALL=averaged subcortical correlation.

210 Although some subcortical regions display a positive *SST-PVALB* spatial correlation (e.g.  
211 striatum), anatomically defined regions do not always reflect functional organization<sup>38</sup>. For instance, the  
212 putamen contains subregions that differentially couple with default, frontoparietal, and somato/motor  
213 cortical functional networks<sup>39</sup>. Consequently, interneuron markers may show stereotyped patterns of  
214 expression when viewed through the lens of global functional network architecture rather than anatomy.  
215 Parallel distributed networks connect cortex, striatum, and thalamus to support complex affective,  
216 cognitive and motor behaviors<sup>40</sup>. To characterize relationships between these network boundaries and  
217 interneuron subtype organization, AHBA samples were aligned and analyzed according to functional  
218 parcellations of the striatum<sup>39</sup> and thalamus<sup>41</sup>. Suggesting that interneuron subtypes differentiate large-  
219 scale functional networks, paired-sample *t*-tests revealed significantly greater expression of *SST*, relative  
220 to *PVALB*, within a distributed limbic network encompassing ventral striatum ( $t(15)=6.08$ ,  $p=2.1e-5$ ),  
221 mediodorsal thalamus ( $t(72)=2.41$ ,  $p=0.018$ ; Figure 3c), and subgenual anterior cingulate and medial  
222 prefrontal cortex (mPFC; Figure 3e). Furthermore, we established that *SST*-biased sub-regions of the  
223 thalamus and striatum (Figure 3e-f) form a distributed functional network using resting-state data from an  
224 adult community-based sample (percent female=54.47, Age=62.66 (SD 7.45), min=45, max=80) from the  
225 UK Biobank project (N=9,627 see Supplemental Figures 3 & 4 for cortical correlations). Limbic striatum  
226 and default thalamus (Figure 3c) displayed overlapping positive functional connections ( $r's>0.05$ ) within  
227 medial prefrontal cortex (Figure 3e), an area with strong preferential expression of *SST* ( $F(1,337)=14.09$ ,  
228  $p=0.0002$ ; Figure 3g). This mPFC-ventral striatum-mediodorsal thalamus network broadly supports  
229 reward and affective information processing and is consistently implicated in affective disorders<sup>42</sup>.

230 Among regions of a distributed somato/motor network, relative *PVALB* expression was increased  
231 within sensory and motor cortex (Figure 3f) and dorsolateral putamen ( $t(11)=3.47$ ,  $p=0.031$ ), but not  
232 within ventrolateral thalamus ( $t(5)=1.22$ ,  $p=0.28$ ; Figure 3d), which may be due to particularly sparse  
233 sampling in this region ( $n=5$ ). A visual medial occipital area of the thalamus also displayed preferential  
234 expression of *PVALB* ( $t(14)=2.74$ ,  $p=0.016$ ; Figure 3b), consistent with the proposal that *PVALB/SST*  
235 ratios are higher in distributed whole-brain networks that process visual and sensorimotor information<sup>13</sup>.  
236 Supporting this distinction, both somato/motor striatum and thalamus (Figure 3d) were positively  
237 functionally coupled ( $r's>0.03$ ) to motor and sensory cortex (Figure 3f), which show a *PVALB* expression  
238 bias ( $F(1,337)=6.86$ ,  $p=0.009$ ; Figure 3h).

239 Suggesting the *SST/PVALB* dissociation also extends to the midbrain, relative expression of *SST*  
240 ( $M=1.15$  SD=0.52) was greater than that of *PVALB* ( $M=-0.24$  SD=0.71) among ventral tegmental area  
241 (VTA) samples ( $t(12)=-7.17$ ,  $p=1.1e-5$ ), whereas *PVALB* ( $M=0.69$  SD=0.88) was greater than *SST* ( $M=-$   
242  $0.13$  SD=0.90) in the substantia nigra reticulata (STNr;  $t(23)=2.98$ ,  $p=0.006$ ; Supplemental Figure 2). The  
243 VTA is densely interconnected to other *SST*-biased regions, including the nucleus accumbens (NAcc),  
244 anterior cingulate cortex, and mediodorsal thalamus<sup>42</sup>, whereas functional neuroimaging and tract-tracing  
245 work suggests the substantia nigra pars reticulata (SNr) preferentially functionally couples to motor areas  
246 and is reciprocally connected to sensorimotor striatum<sup>40,43,44</sup>. Together, these data suggest that *SST*

247 expression is greater within distributed limbic and affect-related regions, whereas *PVALB* expression is  
248 elevated within a distributed sensorimotor processing network.

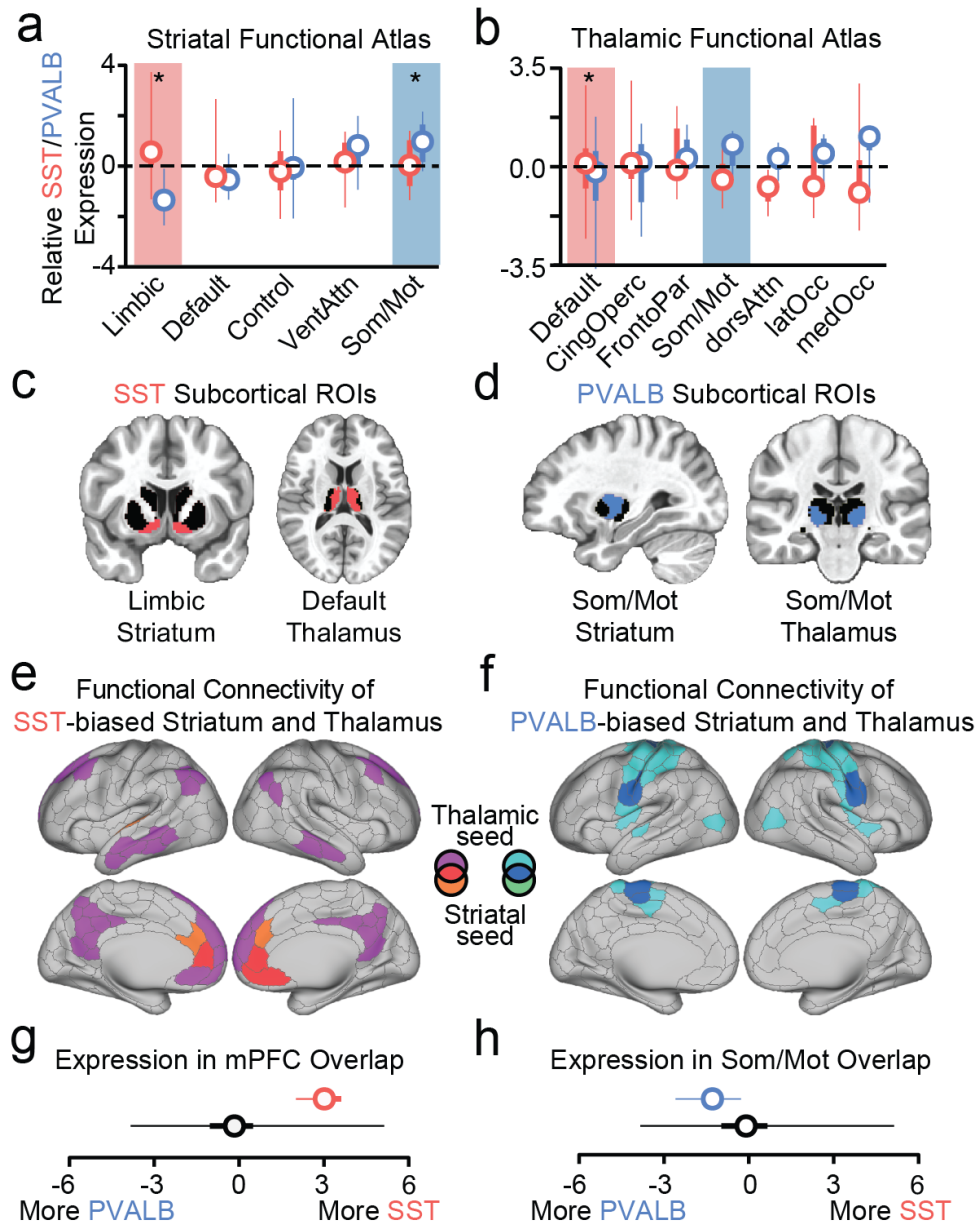

249  
 250 **Figure 3. Differential SST/PVALB expression in distributed limbic and somato/motor networks.** (a  
 251 and b) Relative SST and PVALB expression across functionally defined striatal and thalamic subregions.  
 252 (c) Relative expression of SST was highest within limbic striatum and default thalamus. (d) Relative  
 253 PVALB expression was greater within somato/motor striatum and somato/motor thalamus. (e) Limbic  
 254 striatum and default thalamus possess overlapping positive resting state correlations to SST-biased  
 255 aspects of medial prefrontal cortex (mPFC;  $r$ 's $\geq$ 0.05). Likewise, (f) somato/motor striatum and thalamus  
 256 show overlapping positive correlations to PVALB-biased portions of somatosensory cortex ( $r$ 's $\geq$ 0.03). (g)  
 257 SST expression within the 3 overlapping mPFC limbic parcels is greater than all other cortical parcels. (h)  
 258 PVALB expression within the 15 overlapping somato/motor parcels is greater than all other cortical  
 259 parcels.

260 **SST/PVALB ratios co-vary with resting-state signal amplitude across cortex.**

261 Computational work in rodents posits that the ratio of SST to PVALB interneurons contributes to  
262 regional differences in function and hierarchical organization across cortex<sup>13</sup>. Sensory and association  
263 cortices display hierarchically organized timescales of spiking activity that progress from shorter to longer,  
264 respectively<sup>17,45</sup>. This aspect of functional organization may be indexed by variability in the resting-state  
265 BOLD signal. Accordingly, we examined whether the ratio of cortical SST/PVALB expression relates to an  
266 *in-vivo* measurement of cortical signal variability, resting-state functional amplitude (RSFA)<sup>46</sup>. Voxel-wise  
267 RSFA was calculated using the UK Biobank sample (n=9,627) and averaged across the 400 parcel  
268 functional atlas of Schaefer and colleagues<sup>47</sup>.

269 We first established the heritability of RSFA. Between-subjects hierarchical clustering was used  
270 to identify cortical territories with similar patterns of signal amplitude across individuals (Figure 4a),  
271 corresponding to limbic (light beige), cingulo-opercular (teal), temporo-parietal (orange), prefrontal (red),  
272 somato/motor (blue), and visual (purple) clusters. Consistent with recent work<sup>48</sup>, this data-driven  
273 dimensionality reduction broadly categorized association and unimodal aspects of cortex. Suggesting that  
274 individual differences in RSFA can be explained by genetic variation in the general population, a  
275 significant proportion of between-subject variation in cluster-wise RSFA was found to be due to common  
276 genetic factors [ $h^2_{\text{SNP}}$ : limbic=0.27 (SE 0.04), cingulo-opercular=0.22 (SE 0.04), temporo-parietal=0.28 (SE  
277 0.04), prefrontal=0.31 (SE 0.04), somato/motor=0.21 (SE 0.04), visual=0.06 (SE 0.04)]<sup>49</sup>. See  
278 Supplemental Figure 5 for parcel-wise estimates of RSFA heritability.

279 Expression data from the AHBA were used to test whether interneuron ratios track the spatial  
280 layout of RSFA signal variability across the cortical sheet. Earlier work has documented a correlation of  
281 interneurons marker expression with fractional Amplitude of Low-Frequency Fluctuations (fALFF)<sup>50</sup>, a  
282 metric closely tied to RSFA, within a circumscribed set of cortical areas. Across the whole-brain Schaefer  
283 cortical parcellation, SST/PVALB ratio was negatively correlated with resting-state signal amplitude  
284 ( $r(337)=-0.52$ ,  $p\leq 2.2e-16$ ; Figure 4c. Parcels with higher relative expression of SST had lower RSFA (e.g.  
285 limbic parcels). Conversely, clusters with higher relative PVALB had higher RSFA (e.g., visual, parietal).  
286 Across individual interneuron markers, we observed a positive correlation to parcel-wise RSFA and  
287 expression of PVALB ( $r=0.48$ ,  $p\leq 2.2e-16$ ), and a negative correlation to SST ( $r=-0.44$ ,  $p\leq 2.2e-16$ ).

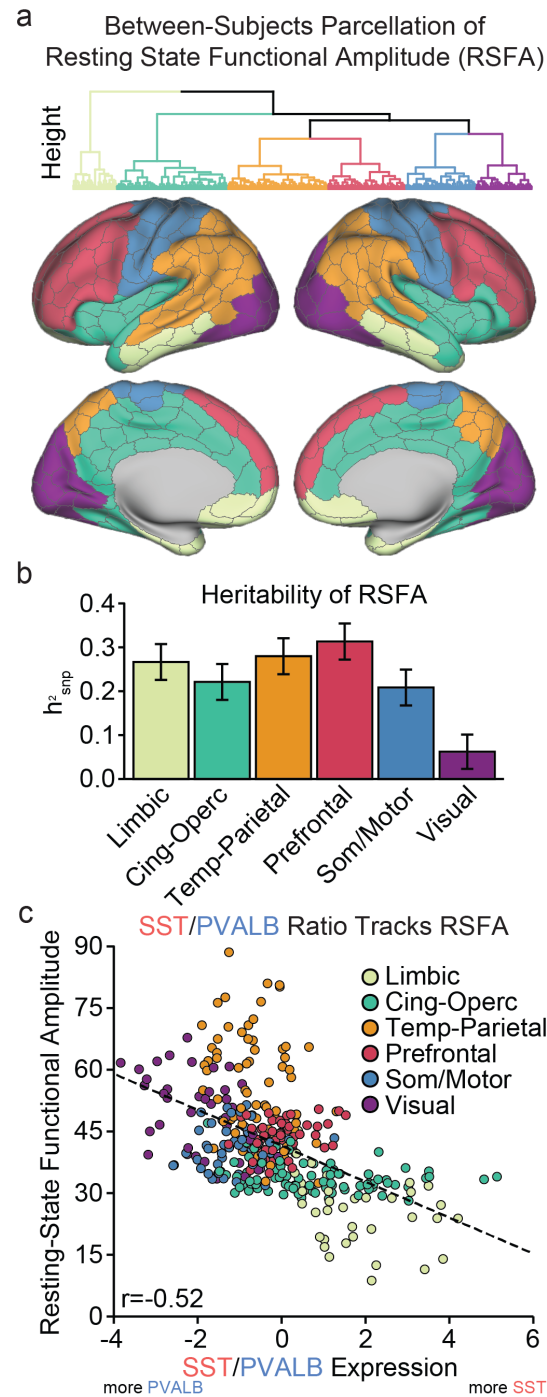

288

289 **Figure 4. SST/PVALB ratio tracks inter-regional differences in cortical brain function.** (a) Mean

290 RSFA was calculated for each of 400 volumetric cortical parcels from the Schaefer parcellation<sup>47</sup>.

291 Between-subjects hierarchical clustering of residualized RSFA values revealed 7-clusters of parcels with

292 similar amplitude signatures; Light beige=limbic, teal=cingulo-opercular, orange=temporal-parietal,

293 red=prefrontal, blue=somato/motor, and purple=visual. (b) Overall, a significant proportion of variability of

294 RSFA was explained by common genetic variation ( $h^2_{SNP}$ =0.06-0.31; error bars=standard error) (c) Parcel-

295 wise relative expression of SST/PVALB is negatively correlated to RSFA ( $r(337)=-0.52$ ,  $p \leq 2.2e-16$ ).

## 296 **Polygenic variation among *PVALB*-correlated genes underlies cortical brain function**

297 Genome-Wide Association Studies (GWAS) demonstrate that the genetic bases of many complex  
298 traits are due to the cumulative weight of genetic variants spread across the entire genome, each with a  
299 subtle effect<sup>51</sup>. Although brain phenotypes such as resting-state functional amplitude likely display such a  
300 polygenic architecture<sup>52</sup>, phenotype-relevant polymorphisms can cluster in genes expressed within  
301 relevant tissue and cell types<sup>53</sup>. Given that cortical resting-state functional amplitude tracks the  
302 topography of interneuron ratios, we next tested whether single-nucleotide polymorphisms (SNPs)  
303 underlying the heritable variance in brain activity (i.e. RSFA) are enriched within genes linked to *PVALB*  
304 and *SST*. The observation that RSFA-related SNPs are enriched within interneuron-related genes would  
305 yield insight into the molecular basis of the resting-state BOLD fluctuations.

306 Interneuron-correlated gene sets were nominated using a guilt-by-association logic. That is,  
307 genes that were spatially correlated to interneuron markers (i.e. *SST*, *PVALB*) were assumed to relate to  
308 each interneuron subtype. Using cortical AHBA data, genes were rank-ordered based on their spatial  
309 correlation to each interneuron marker and the top 500 most-correlated genes were selected. *PVALB* and  
310 *SST* gene sets were non-overlapping. Interneuron-related SNP lists were generated for each gene set by  
311 identifying variants within  $\pm 5000$  base pairs from transcription start and stop site of each gene. eQTL  
312 variants for each gene set were included, defined using cortical data from the CommonMind consortium<sup>54</sup>  
313 and NIH GTEx<sup>55</sup>. We denote the SNP lists for each interneuron gene set as  $PVALB_{SNP}$  and  $SST_{SNP}$  (see  
314 Supplemental Data). Genetic relatedness matrices were calculated for the UKB sample using each SNP  
315 set, and heritability was estimated using GCTA-REML simultaneously across three partitions:  $PVALB_{SNP}$ ,  
316  $SST_{SNP}$ , and a partition containing all remaining genotyped variants<sup>49</sup>.

317 Indicating that the genetic basis of RSFA, a measure of *in vivo* brain activity, is determined in part  
318 by genes linked to *PVALB* interneurons, the  $PVALB_{SNP}$  set accounted for a significant proportion of  
319 heritable variance of the temporo-parietal ( $h^2_{PVALB}=0.029$ , SE=0.0092, q=0.0047), prefrontal  
320 ( $h^2_{PVALB}=0.023$ , SE=0.0091, q=0.016), and somato/motor ( $h^2_{PVALB}=0.019$ , SE=0.0087, q=0.034) RSFA  
321 clusters, but not the limbic ( $h^2_{PVALB}=0.006$ , SE=0.008, q=0.25), cingulo-opercular ( $h^2_{PVALB}=0.006$ ,  
322 SE=0.0082, q=0.25), or visual ( $h^2_{PVALB}=0.012$ , SE=0.008, q=0.11) clusters. Conversely, the  $SST_{SNP}$  set did  
323 not explain a significant proportion of heritable variance across any partition ( $h^2_{SST} < 0.0075$ , ps>0.46). A  
324 key question is whether the genetic variance explained by the  $PVALB_{SNP}$  set is greater than what is  
325 expected given the number of SNPs examined, which would indicate the outsized, or enriched, role of  
326 these genetic variants in RSFA. Enrichment was calculated as the proportion of heritability explained by  
327 the partition, divided by the fraction of SNPs in that partition, where a value greater than 1 denotes  
328 enrichment. We observed fold enrichment greater than 1 for visual (enrich=6.49 SE=0.28), motor  
329 (enrich=3.02 SE=0.30), temporo-parietal (enrich=3.64 SE=0.32), prefrontal (enrich=2.53 SE=0.31)  
330 clusters, but not limbic (enrich=0.76 SE=0.29) or cingulo-opercular (enrich=0.86 SE=0.28). The  
331  $PVALB_{SNP}$  list (N=9,819 variants) constituted 2.9% of total analyzable genotyped SNPs (N=337,356  
332 variants), but accounted for 2.2-18.9% (M=8.4 SD=6.1) of total genetic variance across each of the RSFA



333 clusters (Figure 5a). The  $SST_{SNP}$  partition (2.6% of available variants) did not explain a significant  
334 proportion of genetic variance for any RSFA cluster.

335         An important unanswered question is whether the genetic determinants of RSFA are uniform  
336 across cortex, or whether they vary according to underlying cytoarchitecture. We next tested whether the  
337  $PVALB_{SNP}$  and  $SST_{SNP}$  partitions explain a greater percentage of heritable RSFA variance in regions  
338 where the respective marker is expressed most. Partitioned heritability analyses were performed for each  
339 of the 400 Schaefer cortical parcels. Across all parcels with available AHBA expression data, normalized  
340 genetic variance explained by the  $PVALB_{SNP}$  partition was positively correlated to *PVALB* expression  
341 (Figure 5b;  $r(326)=0.36$ ,  $p=1.78e-11$ ), corresponding to visual, superior temporal, and parietal areas of  
342 cortex (Figure 5b). Across all genes, *PVALB* was among the top 64 transcripts (top 0.003% of 20,738  
343 transcripts) showing a positive spatial correlation to the  $PVALB_{SNP}$  partition map (i.e. Figure 5b), indicating  
344 that this positive relationship is not obligated by global statistical properties. Conversely, partitioned  
345  $PVALB_{SNP}$  heritability was negatively correlated to *SST* expression ( $r(326)=-0.36$ ,  $p=2.85e-11$ ). There was  
346 not a significant parcel-wise relationship between  $SST_{SNP}$  partitioned heritability and *SST* gene expression  
347 ( $r(326)=-0.03$ ,  $p=0.54$ ). Together, these findings indicate that the molecular genetic basis of resting-state  
348 functional amplitude is spatially heterogeneous, demonstrating a particularly important role of genes co-  
349 expressed with *PVALB*.

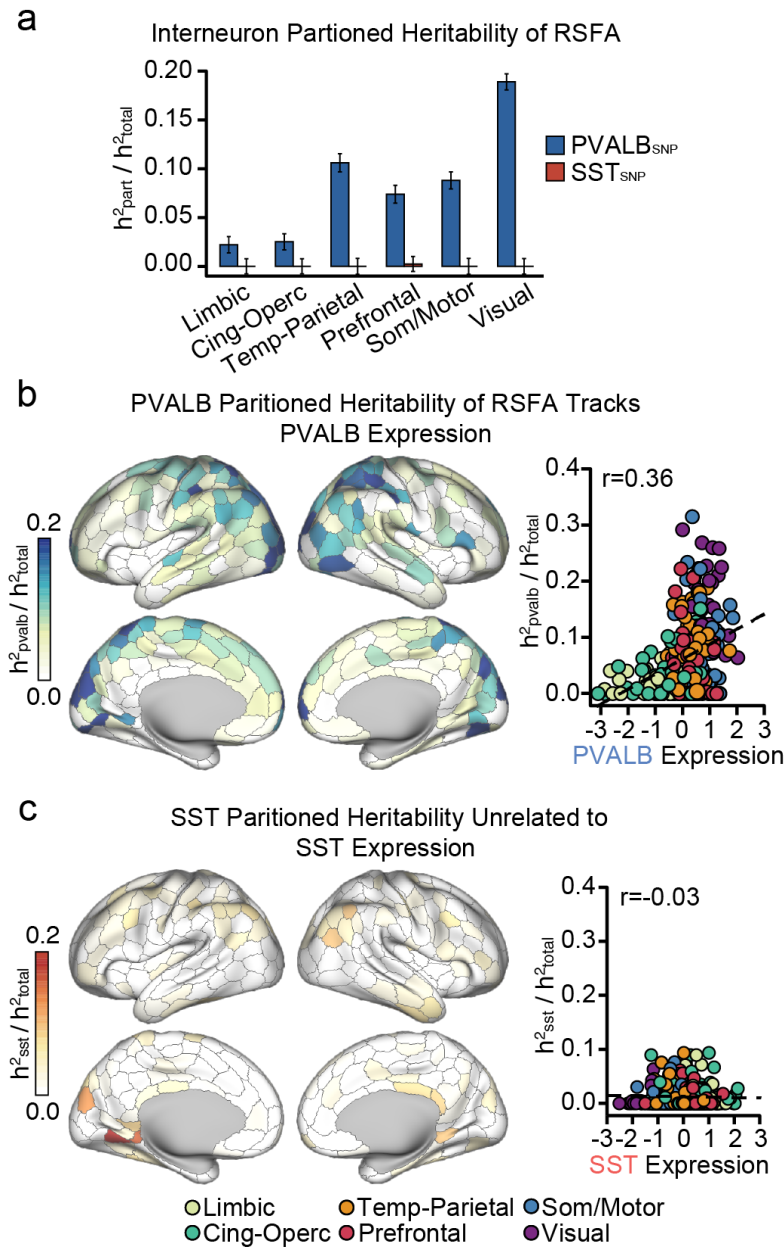

350

351 **Figure 5. PVALB genes underlie spatially variable patterns of heritable brain function.** (a) Across  
 352 the six data-defined RSFA clusters, the 500 gene PVALB<sub>SNP</sub> set accounted for a significant proportion of  
 353 heritable variance in cingulo-opercular, prefrontal, and temporo-parietal areas. PVALB<sub>SNP</sub> enrichment was  
 354 observed within temporo-parietal, prefrontal, som/motor, and visual clusters. (b) Parcel-wise partitioned  
 355 heritability tracks sub-type specific gene expression for PVALB<sub>SNP</sub> ( $r(326)=0.36$ ,  $p=1.78e-11$ ), (c) but not  
 356 the SST<sub>SNP</sub> ( $r(326)=-0.03$ ,  $p=0.54$ ), partitions. Error bars=SE.

357 **The association between genetic risk for schizophrenia and brain function follows the spatial**  
358 **profile of *PVALB* expression**

359 Understanding the molecular genetic underpinnings of brain function is pressing given the need  
360 for empirically informed treatment targets for heritable, brain-based, psychiatric illnesses like  
361 schizophrenia<sup>56</sup>. Convergent evidence from animal models and post-mortem tissue analyses suggests  
362 that interneuron dysfunction as a core pathophysiological feature of schizophrenia<sup>57</sup>. To determine  
363 whether interneuron-related genetic variation is tied to disease liability, we tested whether polygenic risk  
364 for schizophrenia<sup>58</sup> is greater among *PVALB*<sub>SNP</sub> and *SST*<sub>SNP</sub> variants, relative to the rest of the genome.  
365 Using a partitioned MAGMA analysis<sup>59</sup>, we divided rank-ordered *PVALB*, and *SST* gene lists into bins of  
366 500. Using MAGMA, we observed significant enrichment of schizophrenia polygenic risk for the top  
367 *PVALB* gene set (beta=0.083, p=0.038), but not the top *SST* (beta=-0.01, p=0.61). Suggesting that  
368 polygenic schizophrenia risk is greater among interneuron-related genes, we examined all gene bins  
369 examined and found that the enrichment of schizophrenia genetic risk decreased as gene bins became  
370 less spatially correlated with *PVALB* ( $r(18)=-0.65$ , p=0.0017), but not *SST* ( $r(18)=-0.39$ , p=0.09; Figure  
371 6a).

372 To test whether polygenic risk for schizophrenia influences cortical RSFA, we calculated a  
373 schizophrenia polygenic risk score (SCZ-PRS)<sup>60</sup> using genotyped variants from individuals in the UK  
374 Biobank imaging sample. Across the data-derived RSFA clusters, SCZ-PRS negatively predicted RSFA in  
375 the visual cluster (Benjamini-Hochberg corrected q=0.016; Figure 6b; GWAS threshold p<1.0), as well as  
376 somato/motor (q=0.070) and prefrontal (q=0.097) clusters at trend-levels. Consistent with the  
377 hypothesized link between *PVALB* interneurons and psychotic illness, the relationship between RSFA  
378 and polygenic schizophrenia risk was significantly negatively correlated to the topography of *PVALB*  
379 expression across cortex ( $r(337)=-0.43$ , p≤2.2e-16; Figure 6c). That is, regions where SCZ-PRS most  
380 negatively predicted RSFA corresponded to areas with the greatest *PVALB* expression (e.g. motor and  
381 visual parcels). This relationship remained significant after controlling for the overall SNP-wise heritability  
382 of each parcel ( $\beta=-.38$ ,  $t(336)=-7.48$ , p=6.73e-13), indicating that the effect is independent of parcel-wise  
383 explainable genetic variance. Comparing the RSFA-schizophrenia polygenic risk map to all genes,  
384 *PVALB* was the among the top 0.0034% negatively correlated expression profiles (72 out of 20,738),  
385 showing that this relationship is not obligated by globally negative relationships between gene expression  
386 and schizophrenia risk RSFA effects. Ontological enrichment analysis further revealed that the top 500  
387 genes correlated with *PVALB* in the AHBA data contained genes associated to schizophrenia and bipolar  
388 disorder, neuronal signaling, and gated channel activity (Table 1). Together, these data suggest that  
389 schizophrenia-related genetic variants cluster within cell types, particularly parvalbumin interneurons,  
390 leading to differential functional disruption across cortex.

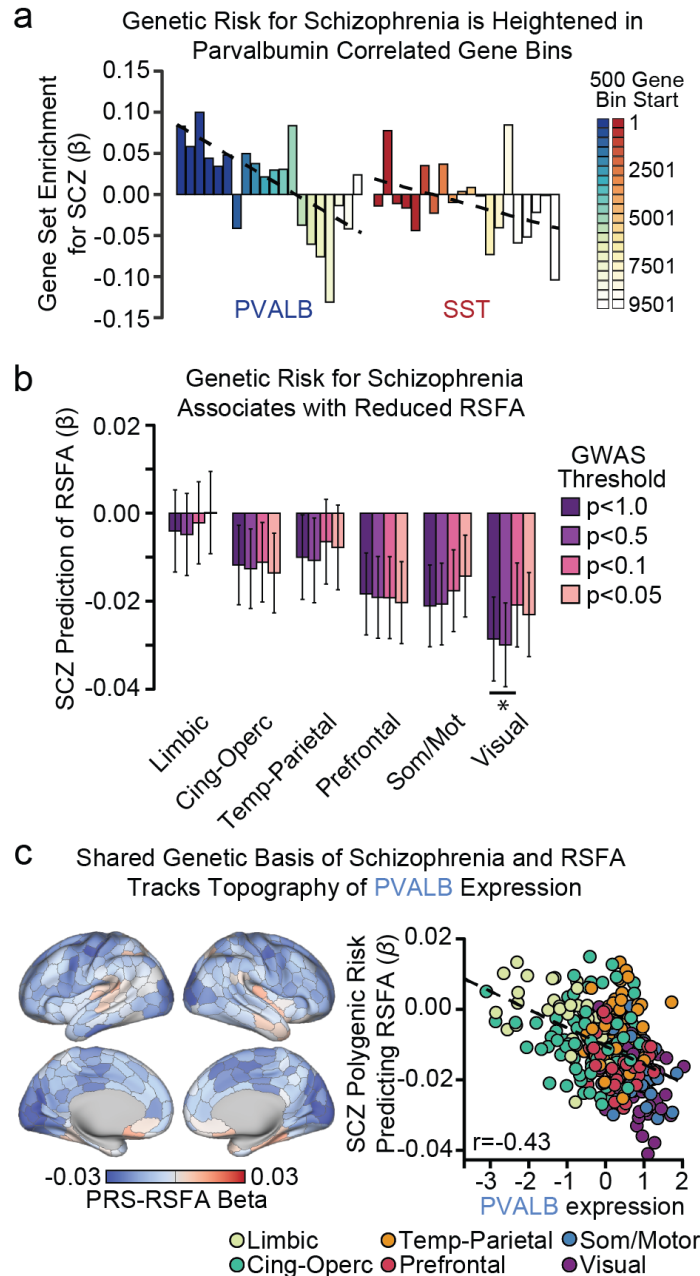

391  
 392 **Figure 6. Schizophrenia polygenic risk predicts brain function and tracks *PVALB* expression.** (a)  
 393 Genes were rank-ordered by cortical spatial correlation to *SST* and *PVALB*, then divided into 500 gene  
 394 bins. MAGMA competitive gene set analysis revealed enrichment of polygenic risk for schizophrenia in  
 395 the top *PVALB* ( $p=0.032$ ), but not the top *SST* ( $p=0.62$ ) set. Enrichment decreased across ordered bins  
 396 for *PVALB* ( $r=-0.65$ ,  $p=0.0017$ ) and *SST* ( $r=-0.39$ ,  $p=0.09$ ). (b) Schizophrenia polygenic risk negatively  
 397 predicts RSFA within the visual ( $q=0.016$ ) cluster, as well as somato/motor ( $q=0.070$ ) and prefrontal  
 398 ( $q=0.097$ ) clusters at trend-levels. (f) Parcel-wise prediction of RSFA by the schizophrenia PRS  
 399 significantly negatively correlated with cortical expression of *PVALB* ( $r=-0.43$ ,  $p=2.2e-16$ ).  
 400 SCZ=schizophrenia; PRS=Polygenic Risk Score; RSFA=Resting State Functional Amplitude.  $*=q\leq 0.05$ .

|       | Category | ID         | Name                                     | p        | q FDR-BH | Hits | Genes in GO |
|-------|----------|------------|------------------------------------------|----------|----------|------|-------------|
| SST   | GO: BP   | GO:0099536 | synaptic signaling                       | 1.08e-5  | 2.16e-2  | 37   | 687         |
|       | GO: BP   | GO:0099537 | trans-synaptic signaling                 | 1.95e-5  | 2.16e-2  | 36   | 678         |
|       | GO: CC   | GO:0097458 | neuron part                              | 3.35e-6  | 6.31e-4  | 68   | 1545        |
|       | GO: CC   | GO:0045202 | synapse                                  | 3.3e-4   | 1.69e-2  | 39   | 870         |
| PVALB | GO: MF   | GO:0005261 | cation channel activity                  | 3.33e-12 | 1.74e-9  | 33   | 306         |
|       | GO: MF   | GO:0005249 | voltage-gated potassium channel activity | 1.33e-10 | 1.69e-8  | 17   | 91          |
|       | GO: BP   | GO:0071805 | potassium ion transmembrane transport    | 2.75e-10 | 6.61e-7  | 23   | 181         |
|       | GO: BP   | GO:0098655 | cation transmembrane transport           | 9.85e-9  | 7.88e-6  | 47   | 738         |
|       | GO: CC   | GO:0034703 | cation channel complex                   | 1.04e-10 | 5.07e-8  | 23   | 176         |
|       | GO: CC   | GO:0034702 | ion channel complex                      | 3.03e-10 | 5.07e-8  | 29   | 291         |
|       | Disease  | C0036341   | Schizophrenia                            | 1.93e-7  | 7.27e-4  | 70   | 1561        |

401

402 **Table 1. Enrichment terms for interneuron-correlated genes.** Ontological enrichment analyses were

403 conducted with ToppGene on the 500 genes used to generate the PVALB<sub>SNP</sub> and SST<sub>SNP</sub> lists.

404

## Discussion

405 Integrating genetic, transcriptional, and neuroimaging data, we demonstrate that spatial  
406 distributions of interneurons are stereotyped across species and development, align to the topographic  
407 distribution of functional brain networks, and underlie a substantial portion of the heritable aspects of  
408 resting-state functional amplitude, a measure of *in vivo* brain activity. Somatostatin- and parvalbumin-  
409 interneuron markers were negatively spatially correlated across cortex, a relationship that was robust in  
410 early developmental periods in humans and evolutionarily conserved in non-human primates (Figure 1).  
411 Stereotyped patterns of *SST* and *PVALB* expression were observed in subcortex (Figure 2), with *SST*  
412 and *PVALB* differentially expressed within distinct limbic and somato/motor functional networks linking  
413 cortex, striatum, and thalamus (Figure 3), respectively. Computational models theorize that interneuron  
414 ratios underlie regional differences in cortical brain function<sup>13</sup>. Providing empirical support for this  
415 hypothesis, regional differences in *SST/PVALB* expression in post-mortem brain tissue align with spatial  
416 variability in resting-state functional amplitude in the general population (Figure 4). Suggesting the  
417 functional relevance of this spatial relationship, genetic polymorphisms linked to *PVALB* interneurons  
418 accounted for an enriched proportion of heritable variance underlying cortical signal amplitude (Figure 5).  
419 Critically, the amount of variance explained by *PVALB* SNPs positively tracked spatial expression of  
420 *PVALB*, suggesting that common genetic polymorphisms influence brain function in a cell-type specific  
421 and regionally variable manner. Implicating genetic differences among interneurons in schizophrenia,  
422 schizophrenia-related polygenic risk was enriched among genes co-expressed with interneurons, and  
423 predicted reduced resting-state functional amplitude across cortex in a manner that tracked the spatial  
424 landscape of *PVALB* gene expression (Figure 6).

425 Adaptive functioning depends on the brain's capacity to integrate information across timescales.  
426 Higher-order cognition often requires information accumulation over time, whereas sensorimotor  
427 processing entails rapid adaption to changing external stimuli<sup>18,47,65,66</sup>. These informational demands are  
428 met, in part, through the hierarchical organization of anatomic and functional connections in cortex, as  
429 well cytoarchitectural gradients that underlie regional specialization<sup>12,61</sup>. Our data indicate that interneuron  
430 ratios, as indexed by *SST* and *PVALB* expression, are an important feature underlying regional  
431 differences in brain function (Figure 4). Due to unique electrical and synaptic properties of somatostatin  
432 and parvalbumin interneurons, relative shifts in their density can alter the balance of inhibitory control<sup>13</sup>.  
433 *SST* interneurons synapse onto dendrites of pyramidal neurons to gate incoming cortical signals,  
434 whereas *PVALB* interneurons provide perisomatic inhibition that is well-suited for feedback inhibition and  
435 output regulation<sup>2</sup>. Computational models suggest that increased dendritic (i.e. *SST*) over perisomatic (i.e.  
436 *PVALB*) inhibition results in more robust filtering of distracting information, allowing for greater recurrent  
437 excitation in association cortex for complex tasks requiring integration of information over time<sup>20</sup>.  
438 Conversely, sensorimotor regions may benefit from fast responses and lower recurrent excitation to adapt  
439 to rapidly changing inputs<sup>17</sup>, which could be facilitated by direct inhibitory signals from parvalbumin-  
440 expression interneurons.

441 Our analyses provide molecular genetic support for a relationship between parvalbumin  
442 interneurons and the hemodynamic BOLD signal. A wealth of evidence indicates that BOLD signal most  
443 tightly couples to gamma oscillations (30-80 Hz) relative to other frequency domains<sup>21-25</sup>. Individual  
444 differences of GABA in visual cortex predict both gamma oscillations and BOLD amplitude<sup>62</sup>, a  
445 relationship that animal work suggests is primarily driven by parvalbumin interneurons<sup>19</sup>. Here, we provide  
446 initial evidence in humans for the preferential influence of parvalbumin interneurons on fMRI signal. For  
447 instance, polygenic variation among parvalbumin correlated genes explained upwards of 18% of the  
448 heritable variance in RSFA in visual cortex.

449 Schizophrenia is among the most heritable forms of psychiatric illness ( $h^2=81\%$ )<sup>63</sup>, underscoring  
450 the pressing need to map polygenic variation to illness-related brain phenotypes and associated risk  
451 factors. Converging lines of evidence point to GABAergic abnormalities as a cardinal feature of the  
452 disorder<sup>64</sup>, highlighting a particular role of parvalbumin interneurons<sup>26</sup>. Patients with schizophrenia exhibit  
453 reduced levels of GAD67, an enzymatic precursor of GABA<sup>65</sup>, and are characterized by parvalbumin  
454 interneurons with atypical perineuronal nets<sup>66</sup>, dysregulated mitochondrial gene transcription<sup>67</sup>, and  
455 reduced potassium signaling channels<sup>68</sup> relative to healthy populations. These abnormalities are thought  
456 to underlie disrupted gamma-band oscillations and working memory deficits which are a hallmark of the  
457 disorder<sup>64</sup>. Linking these observations, we demonstrate here that polygenic risk for schizophrenia is  
458 increased among genes that are spatially correlated to *PVALB* (Figure 6a), expanding upon cell  
459 transcriptomic work implicating cortical interneurons as an illness marker<sup>53</sup>. Consistent with a relationship  
460 between schizophrenia-linked genetic vulnerability and brain function, we document a negative  
461 association between individual polygenic schizophrenia risk and resting-state functional amplitude in a  
462 large population-based sample (Figure 6b). Importantly, the topography of these effects follows spatial  
463 profile of *PVALB* expression across cortex (Figure 6c), highlighting the potential role of parvalbumin  
464 interneurons in mediating brain-based intermediate phenotypes associated with illness risk.

465 Disruption of excitatory/inhibitory balance is thought to reflect a cross-diagnostic marker of  
466 psychiatric illness<sup>69</sup>. For instance, decreased expression of parvalbumin cell markers is evident in both  
467 schizophrenia and bipolar disorder<sup>70</sup>, while major depressive disorder (MDD) is marked by selective  
468 reductions in somatostatin interneurons<sup>71</sup>. Delineating the region-specific functional roles of cortical  
469 interneuron subtypes will provide biological insight into cross-diagnostic patterns of both behavior and  
470 brain function. With regard to depressed mood and negative affect, modulation of cortical somatostatin  
471 interneurons can causally influence anxiety- and depressive-like behavioral phenotypes in rodents<sup>7,72</sup>. In  
472 line with this observation, we observe the greatest expression of somatostatin within a distributed limbic  
473 network linking mPFC, NAcc, and mediodorsal thalamus (Figure 3) that processes reward and affective  
474 information<sup>42</sup>. Somatostatin-biased cortical regions (ACC, mPFC, and insula) also correspond to areas  
475 where cortical thinning has been observed in patients with MDD<sup>73,74</sup> and individuals reporting elevated  
476 negative affect<sup>75</sup>. These converging lines of evidence support the hypothesized role of somatostatin

477 neurons in mood-related psychiatric symptoms<sup>71</sup>, which should be explored in future work on the  
478 molecular and neural underpinnings of affective illness.

479         The present findings should be interpreted in light of several limitations. First, we use single  
480 molecular markers to infer the relative presence of SST and PVALB interneurons, which are not sensitive  
481 to morphological and physiological differences among interneuron subgroups<sup>2</sup>. More nuanced inference  
482 of cellular spatial distributions should be conducted as single-cell transcriptomic atlases are developed in  
483 humans. Further, we employ a “guilt-by-association” logic to nominate interneuron related gene sets.  
484 While we cannot conclude that genes within each identified interneuron group directly influence  
485 interneuron function, similar correlation-based nomination approaches have been shown to correspond  
486 well with *a priori* defined gene groups<sup>76</sup>. The examination of enrichment terms (Table 1; Supplemental  
487 Information) allows for more precise understanding of the biological processes contributing to our results.  
488 Lastly, the *in vivo* imaging and genetic analyses focus on an aging population of White/non-Latino  
489 individuals. As genetic effects can vary across ethnic and demographic subgroups<sup>77,78</sup>, the stability of the  
490 results reported here should be examined across diverse populations.

491         Inherited genetic variation shapes brain function within and across individuals<sup>79,80</sup>. There is  
492 pressing need to identify specific molecular genetic mechanisms of human brain function to expand our  
493 biological understanding of cognition, behavior, and associated risk for psychiatric illness. Analyses of  
494 spatially-dense, whole-genome, expression atlases increasingly reveal transcriptional correlates of brain  
495 function<sup>50</sup>, structure<sup>12,87-89</sup>, functional connectivity<sup>8-10</sup>, and psychiatric illness<sup>81</sup>. With the emergence of  
496 large-scale imaging genetic data<sup>27</sup>, it is now possible to bridge structural genetic, transcriptional, and  
497 large-scale neuroimaging brain phenotypes. Here, we leverage these data to show that interneuron  
498 marker distributions correlate with cortical signal amplitude, align to distributed functional networks,  
499 underlie regional differences in heritable brain function, and associate with genetic risk for schizophrenia  
500 in the general population.



501 Methods

502 **Allen Human Brain Atlas.**

503 Publicly available human gene expression data from six postmortem donors (1 female), aged 24–  
504 57 years of age ( $42.5 \pm 13.38$ ) were obtained from the Allen Institute<sup>33</sup>. Data reflect the microarray  
505 normalization pipeline implemented in March 2013 (<http://human.brain-map.org>) and analyses were  
506 conducted according to the guidelines of the Yale University Human Subjects Committee. Microarray  
507 probes from eight overarching ontological categories were selected: cortex, dorsal thalamus, striatum,  
508 globus pallidus, hypothalamus, hippocampus proper (i.e. CA1-CA4), amygdala, and the combined  
509 substantia nigra and ventral tegmentum (see Supplemental Information). For genes with duplicate  
510 probes, the *collapseRows* function<sup>82</sup> was used in R to select the probe with the highest mean expression  
511 (connectivityBasedCollapsing=FALSE), resulting in 20,738 unique mRNA probes. ComBat was used to  
512 normalize expression across donors before combining data from each brain<sup>83</sup>.

513 Individual cortical tissue samples were mapped to each AHBA donor's Freesurfer derived cortical  
514 surfaces, downloaded from Romero-Garcia and colleagues<sup>84</sup>. Native space midthickness surfaces were  
515 transformed to a common fsLR32k group space while maintaining the native cortical geometry of each  
516 individual donor. The native voxel coordinate of each tissue sample was mapped to the closest surface  
517 vertex using tools from the HCP workbench<sup>85</sup>. Microarray expression of each gene was mean- and  
518 variance-normalized (i.e., divided by standard deviation) separately for each of the eight analyzed  
519 regions, revealing relative expression differences within cortical and subcortical territories. For region-  
520 wise expression analyses (e.g. Figure 1c), ontological categories from the AHBA were used to calculate  
521 the median, min-max, and interquartile range of relative expression in each region. Detailed information  
522 about the analyzed regions is provided in the Supplemental Information. Cortical data visualization was  
523 carried out using *wb\_view* from the HCP workbench<sup>85</sup>. The MNI locations of striatal and thalamic samples  
524 were cross-referenced to functional atlases of Choi and colleagues<sup>39</sup> and Hwang and colleagues<sup>41</sup>. With  
525 AFNI, a single voxel ( $1 \text{ mm}^3$ ) region of interest (ROI) was generated at the MNI location of each sample.  
526 A functional network label was assigned if the ROI fell within a volumetric parcel. If the sample did not  
527 overlap with the functional atlas, the associated ROI was expanded to  $2 \text{ mm}^3$  and the network with the  
528 most overlapping voxels in the ROI was assigned. If the expanded  $2 \text{ mm}^3$  ROI did not overlap, the  
529 process was repeated using a  $3 \text{ mm}^3$  ROI. A sample was omitted from analysis if the  $3 \text{ mm}^3$  ROI did not  
530 overlap with the associated functional atlas. Functional sub-regions with 3 or fewer samples were  
531 excluded from analyses.

532  
533 **UKB imaging processing**

534 Minimally preprocessed resting-state fMRI data from the UK Biobank were analyzed, reflecting  
535 the following preprocessing steps: motion correction with MCFLIRT<sup>86</sup>, grand-mean intensity normalization,  
536 highpass temporal filtering, fieldmap unwarping, and gradient distortion correction. Noise terms were  
537 identified and removed using FSL ICA+FIX<sup>87</sup>. Full information on the UKB preprocessing is published<sup>27</sup>.

538 Additional processing was conducted in AFNI<sup>88</sup> and consisted of 3dDespike, resampling to MNI152 space  
539 using the UKB generated linear and nonlinear transforms, FWHM blur of 4.0mm, regression of CSF,WM,  
540 and global resting state signals, and first and second order trend removal. Voxel-wise RSFA maps were  
541 generated with 3dRSFC and then averaged within each of the approximately symmetrical 400 volumetric  
542 parcels from the 7-Network parcellation of Schaefer and colleagues<sup>47</sup>. Due to signal blurring between  
543 lateral striatum and insular cortex, resting-state analyses reflect an additional local white-matter  
544 regression against gray matter using AFNI anatcor. Imaging analyses were conducted in volume, but  
545 visualized on the cortical surface. Resting-state functional connectivity between striatum, thalamus, and  
546 cortex was estimated using AFNI's 3dNetCorr, which calculated the Fisher-Z transformed correlation  
547 values of timeseries across the Choi 7-region striatal atlas<sup>39</sup>, the Hwang 9-region thalamic atlas<sup>41</sup>, and the  
548 Schaefer 400-region cortical atlas<sup>47</sup>.

549 A total of 13,236 UKB subjects were processed through the imaging pipeline. Subjects with mean  
550 run-wise frame-to-frame head motion greater than 0.20mm, and inverted rsfMRI SNR greater than 3  
551 standard deviations above the mean were removed. After filtering for White/Non-Latino subjects with  
552 usable genetic data, cryptic relatedness <0.025, and conducting row-wise deletion for the variables age,  
553 sex, height, weight, BMI, combined gray/white matter volume, combined ventricular/CSF volume, diastolic  
554 and systolic blood pressure, run-wise rsfMRI motion, rsfMRI inverse SNR, T1 inverse SNR, and UK  
555 Biobank assessment center, 9,627 subjects remained for analyses (percent female=54.47, mean  
556 age=63.33 SD=7.45, min/max age=45-80).

557

### 558 **UKB genetics**

559 UK Biobank genotype data was filtered to include only White/Non-Latino subjects with imaging  
560 data passing the quality control thresholds described above. Plink v2.00 was used to remove samples  
561 with missingness >0.10, SNPs with minor-allele frequency <0.05, Hardy-Weinberg equilibrium <1x10<sup>-6</sup>,  
562 and call rate <0.02, resulting in 337,356 autosomal variants<sup>89</sup>. GCTA software was used to calculate a  
563 genetic relatedness matrix to remove individuals with cryptic relatedness more than 0.025, leaving  
564 N=9,627 subjects for analysis<sup>49</sup>. Ten genetic principal components were then calculated for use as  
565 covariates in polygenic risk score and heritability analyses.

566

### 567 **RSFA between-subjects clustering and heritability**

568 Voxel-wise RSFA data from the (N=9,627) UK Biobank sample was averaged within each of 400  
569 roughly symmetric volumetric ROIs from the 7-Network cortical parcellation of Schaefer and colleagues<sup>47</sup>.  
570 Parcel-wise RSFA values were residualized for the effect of age, sex, age<sup>2</sup>, ageXsex, age<sup>2</sup>Xsex, height,  
571 weight, BMI, combined gray/white matter volume (normed for head size), combined ventricular/CSF  
572 volume (normed for head size), diastolic and systolic blood pressure, run-wise rsfMRI motion, rsfMRI  
573 inverse SNR, T1 inverse SNR, and UK Biobank assessment center. Hierarchical clustering of residualized  
574 RSFA estimates was conducted using R in order to group regions with similar between-subject patterns

575 of covariation. A 6-parcel RSFA clustering solution was selected. Raw RSFA values were then averaged  
576 across parcels falling within the same data-derived between-subjects cluster for use in heritability  
577 analyses. SNP-wise heritability of RSFA was estimated with genotyped data using GCTA-REML software.  
578 Age, sex, age<sup>2</sup>, height, weight, BMI, combined normed gray/white matter volume, combined normed  
579 ventricular/CSF volume, diastolic and systolic blood pressure, run-wise rsfMRI motion, rsfMRI inverse  
580 SNR, T1 inverse SNR, UK Biobank assessment center, and 10 genetic principal components were  
581 included as covariates.

582 Partitioned heritability analyses were conducted for the six RSFA clusters and for each of the 400  
583 individual cortical parcels. Using AHBA expression data, genes were rank ordered by their spatial cortical  
584 correlation to *SST* and *PVALB*. Genes without Entrez IDs were removed. The BioMart package<sup>90</sup> was  
585 used to identify each gene's transcription start and stop sites ( $\pm 5000$  base pairs) according to the  
586 GRCh37-hg19 genome assembly. If no UKB genotyped variants fell within the intragenic regions of a  
587 particular gene, that gene was excluded from analyses. Otherwise, the gene was cross-referenced to  
588 cortical eQTL databases from the NIH GTEx project<sup>55</sup> and CommonMind consortium<sup>54</sup>. Intragenic ( $\pm 5000$   
589 base pairs) and eQTL SNPs associated with the top 500 *SST* ( $N_{\text{SNP}}=8,612$ ) and *PVALB* ( $N_{\text{SNP}}=9,819$ )  
590 correlated genes were used for partitioned heritability analyses, respectively denoted *SST*<sub>SNP</sub> and  
591 *PVALB*<sub>SNP</sub>. Genetic-relatedness matrices for the *SST*<sub>SNP</sub> and *PVALB*<sub>SNP</sub> partitions were generated, as well  
592 as one for all remaining genotyped SNPs. RSFA heritability accounted for by each genetic relatedness  
593 matrix was estimated simultaneously for each of the three partitions using GCTA<sup>49</sup>. Partitioned heritability  
594 was then defined as the ratio phenotypic variance explained by either the *SST*<sub>SNP</sub> or *PVALB*<sub>SNP</sub>, divided  
595 by the total phenotypic variance. To calculate the significance of individual partitions, we consider the  
596 Wald test statistic against the null of  $h_{part}^2 = 0$ , which follows a half-half mixture of  $\chi_0^2$  (a  $\chi^2$  distribution  
597 with a probability mass at zero) and  $\chi_1^2$  (a  $\chi^2$  distribution with 1 degree of freedom). Enrichment values  
598 were calculated to determine if the proportion of variability explained by a partition was greater than the  
599 proportion of variants within the partition, defined as:

$$600 \quad enrich_{part} = \frac{(h_{part}^2 / h_{total}^2)}{(g_{part} / g_{total})}$$

601 where  $h_{part}^2$  is the heritable variance explained by the SNP partition (e.g. *PVALB*<sub>SNP</sub>),  $h_{total}^2$  is the  
602 heritable variance explained by all partitions,  $g_{part}$  is the number of variants within the SNP partition, and  
603  $g_{total}$  is the total number of genotyped SNPs. Standard error for SNP partitions were similarly scaled by  
604 the genome partition denominator. When calculating RSFA partitioned heritability across individual  
605 parcels (i.e. Figure 5), parcels with outlier partitioned heritability (i.e. *PVALB*<sub>PART</sub>, *SST*<sub>PART</sub>) and  
606 expression (i.e. *PVALB*, *SST*) greater than 4 standard deviations from the mean were excluding, resulting  
607 in 328 observations across cortex.

608 To assess whether schizophrenia polygenic risk was enriched among *SST* and *PVALB* correlated  
609 gene sets, competitive gene-set analysis was conducted using MAGMA<sup>59</sup>. Rank-ordered *SST* and *PVALB*  
610 genes were divided into twenty non-overlapping 500-gene bins. Schizophrenia summary statistics from

611 the GWAS of Ripke and colleagues was used<sup>58</sup>. Intragenic variants were defined using a  $\pm 5000$  base pair  
612 window, and gene set enrichment was estimated simultaneously across all 40 gene bins, revealing  
613 whether a particular bin is more associated with polygenic risk for schizophrenia than all other genes.  
614 Polygenic risk for schizophrenia<sup>58</sup> was calculated using PRSice<sup>60</sup>. Only the top-SNP from the major  
615 histocompatibility complex was used for generation of individual risk scores. Benjamani-Hochberg False-  
616 discovery rate correction was conducted separately for each GWAS p-value threshold examined (e.g.  
617 correction for 6 tests at the GWAS  $p < 1.0$  threshold).

618

### 619 **NIH Blueprint processing**

620 Publicly available microarray data from six adult macaque primates (3 Female) were downloaded  
621 from the Gene Expression Omnibus website (<https://www.ncbi.nlm.nih.gov/geo>; accession number  
622 GSE31613). Expression values were converted from log<sub>10</sub> to log<sub>2</sub>. Data from two macaques (1 Female)  
623 were excluded due to sparse sampling across cortex. Samples from the following 10 cortical regions were  
624 included in our analyses: OFC, ACC, medial temporal lobe, temporal area, DLPFC, A1C, S1C, M1C, V1,  
625 and V2. The *collapseRows* function<sup>82</sup> was used in R to select the probe with the highest mean expression  
626 and ComBat was used to remove residual donor effects. *SST* and *PVALB* expression were mean and  
627 variance-normalized to reveal relative expression differences across cortex.

628

### 629 **BrainSpan processing**

630 Publicly available RNAseq reads per kilobase per million (RPKM) data from the Brainspan atlas  
631 were used to characterize patterns of interneuron-marker gene expression across development. Cortical  
632 tissue samples were analyzed from early fetal [8-12 post-conception weeks (pcw), N=10, samples=88],  
633 early/mid fetal (13-21 pcw, N=10, samples=88), late fetal (24-37 pcw; N=5, samples=27), early infancy (4  
634 months; N=3, samples=22), late infancy (10 months; N=1, samples=8), early childhood (1-4 yrs; N=5,  
635 samples=41), mid/late childhood (8-11 yrs; N=2, samples=30), adolescence (13-15 yrs; N=2,  
636 samples=14), and adulthood (18-40 yrs; N=8, samples=85) developmental. RNAseq probes without  
637 entrez IDs were excluded and duplicated probes were removed by selecting the probe with the highest  
638 mean expression. Data was log<sub>2</sub> transformed and the effect of donor was removed separately for each  
639 age group using ComBat. Gene expression was then mean- and variance-normalized across cortical  
640 tissue samples separately for each developmental stage. When multiple ages were present in a  
641 development stage, age was included as a covariate in a linear regression predicting normalized *SST*  
642 expression from normalized *PVALB* expression.

643

### 644 **Code Availability**

645 Code used for these analyses will be made available upon publication at the following url:

646 [https://github.com/HolmesLab/Anderson2019\\_interneuron](https://github.com/HolmesLab/Anderson2019_interneuron)

647  
648  
649  
650  
651  
652  
653  
654  
655  
656  
657  
658  
659  
660  
661  
662  
663  
664  
665  
666  
667  
668  
669  
670  
671  
672  
673  
674  
675  
676  
677

SUPPLEMENTAL FIGURES

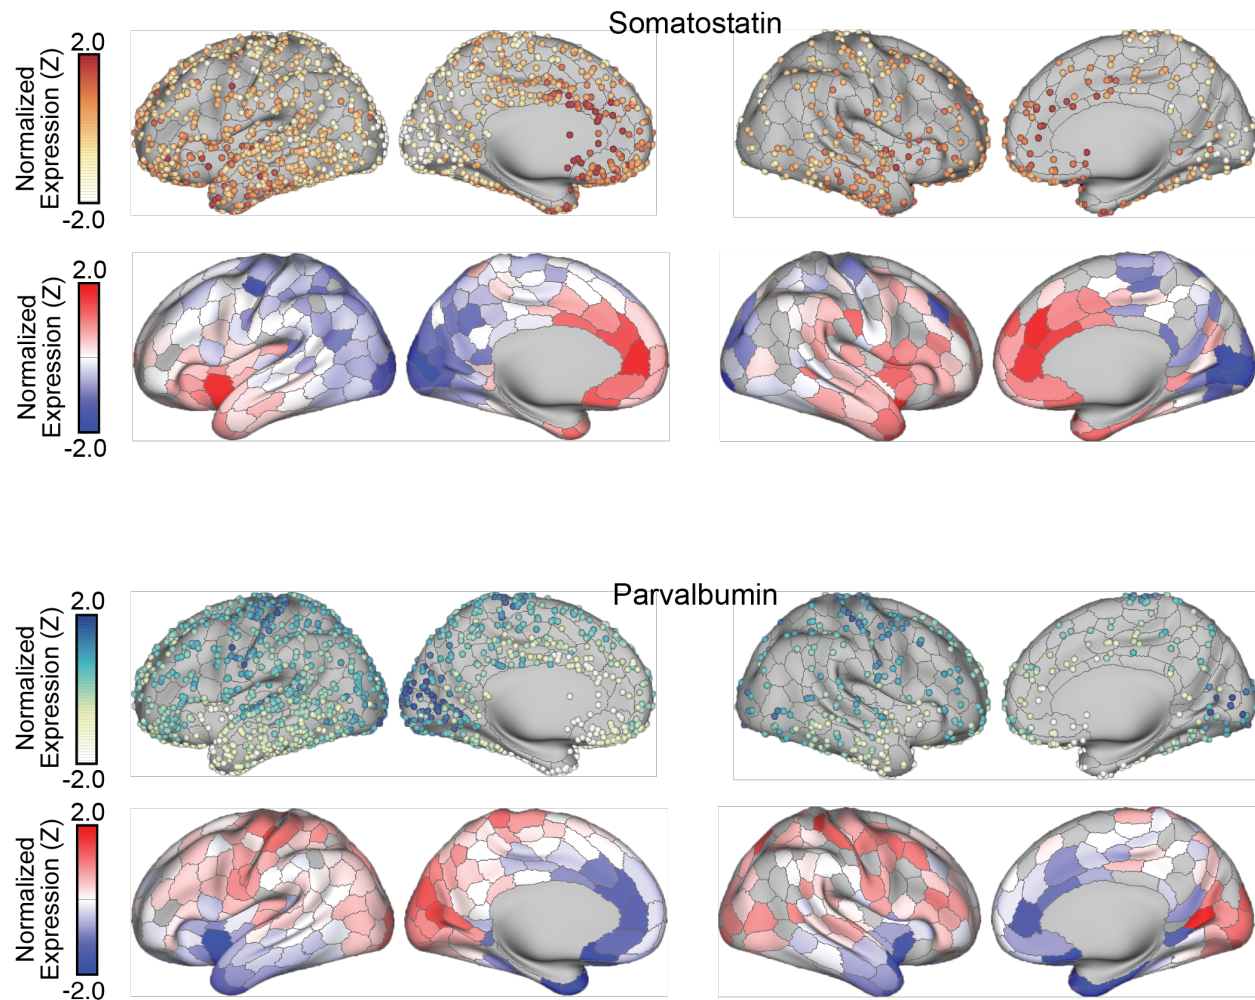

678  
679  
680  
681

**Supplemental Figure 1.** Sample and parcel-wise expression of interneuron markers *SST* and *PVALB*.

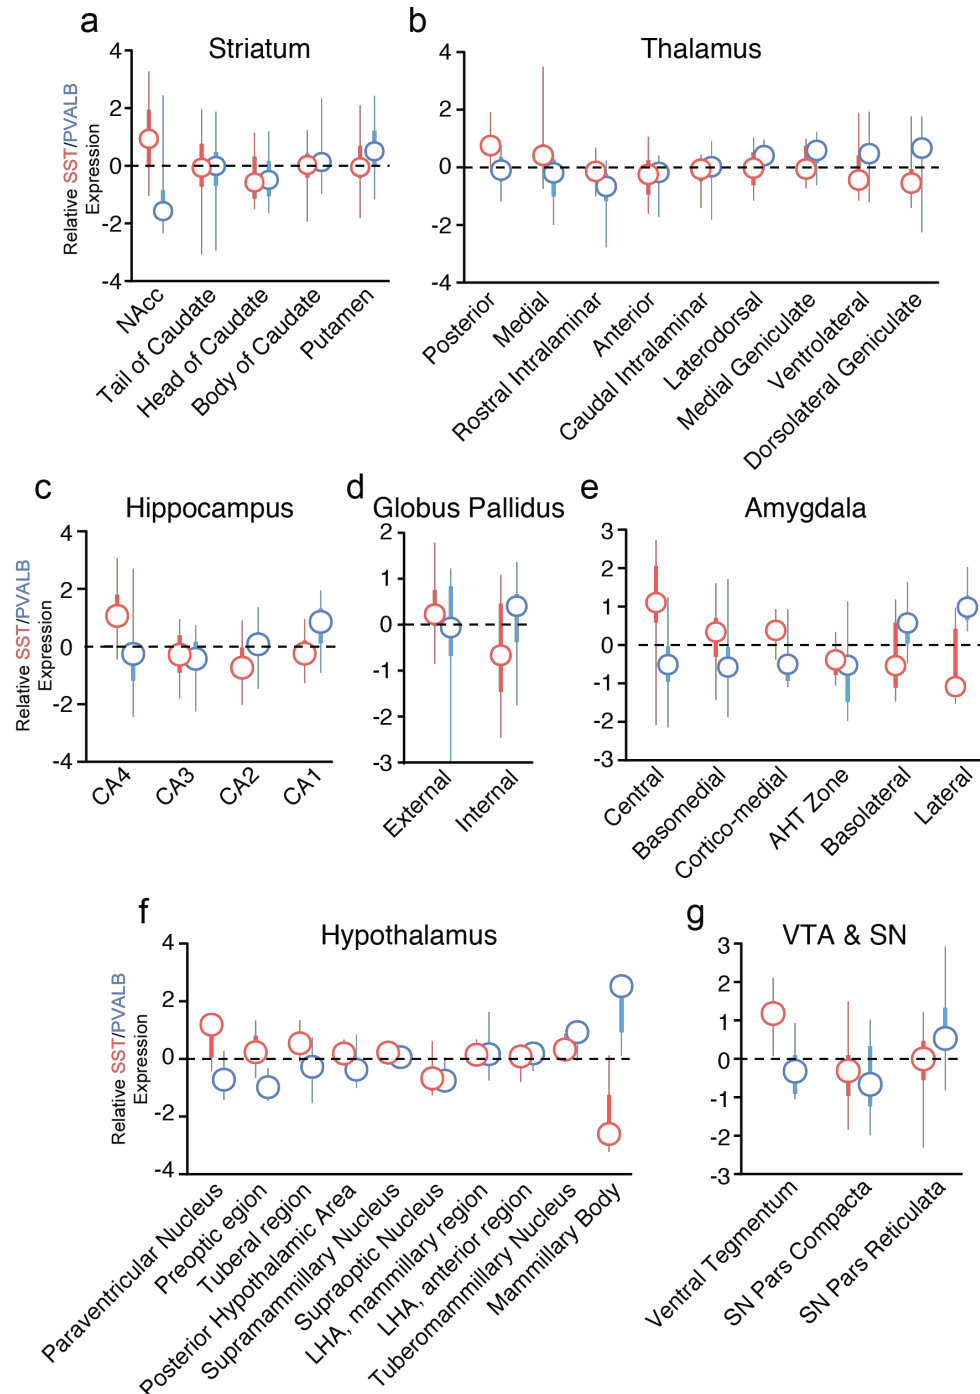

682  
 683 **Supplemental Figure 2.** Z-transformed expression values of SST and PVALB for subregions of (a)  
 684 striatum, (b) thalamus, (c) hippocampus, (d) globus pallidus, (e) amygdala, (f) hypothalamus, and (g)  
 685 combined ventral tegmentum and substantia nigra. Regions are ordered by relative median expression of  
 686 SST to PVALB. Circle=median, thick lines=interquartile range, thin line=minimum and maximum.  
 687

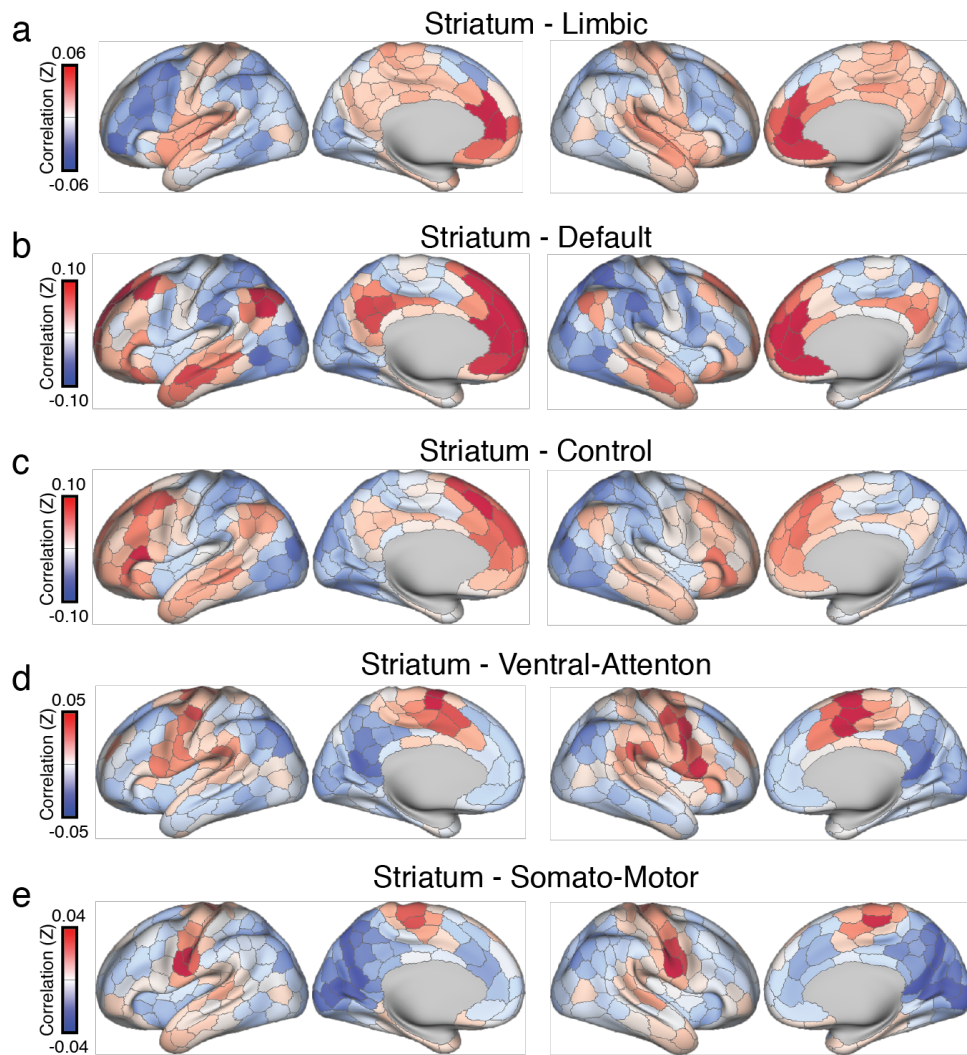

688

689 **Supplemental Figure 3.** Cortical resting-state functional correlation profile for each of the 5 striatal  
690 parcels<sup>39</sup> with analyzable AHBA expression data. Averaged maps were calculated using data from 9,627  
691 participants from the UK Biobank.



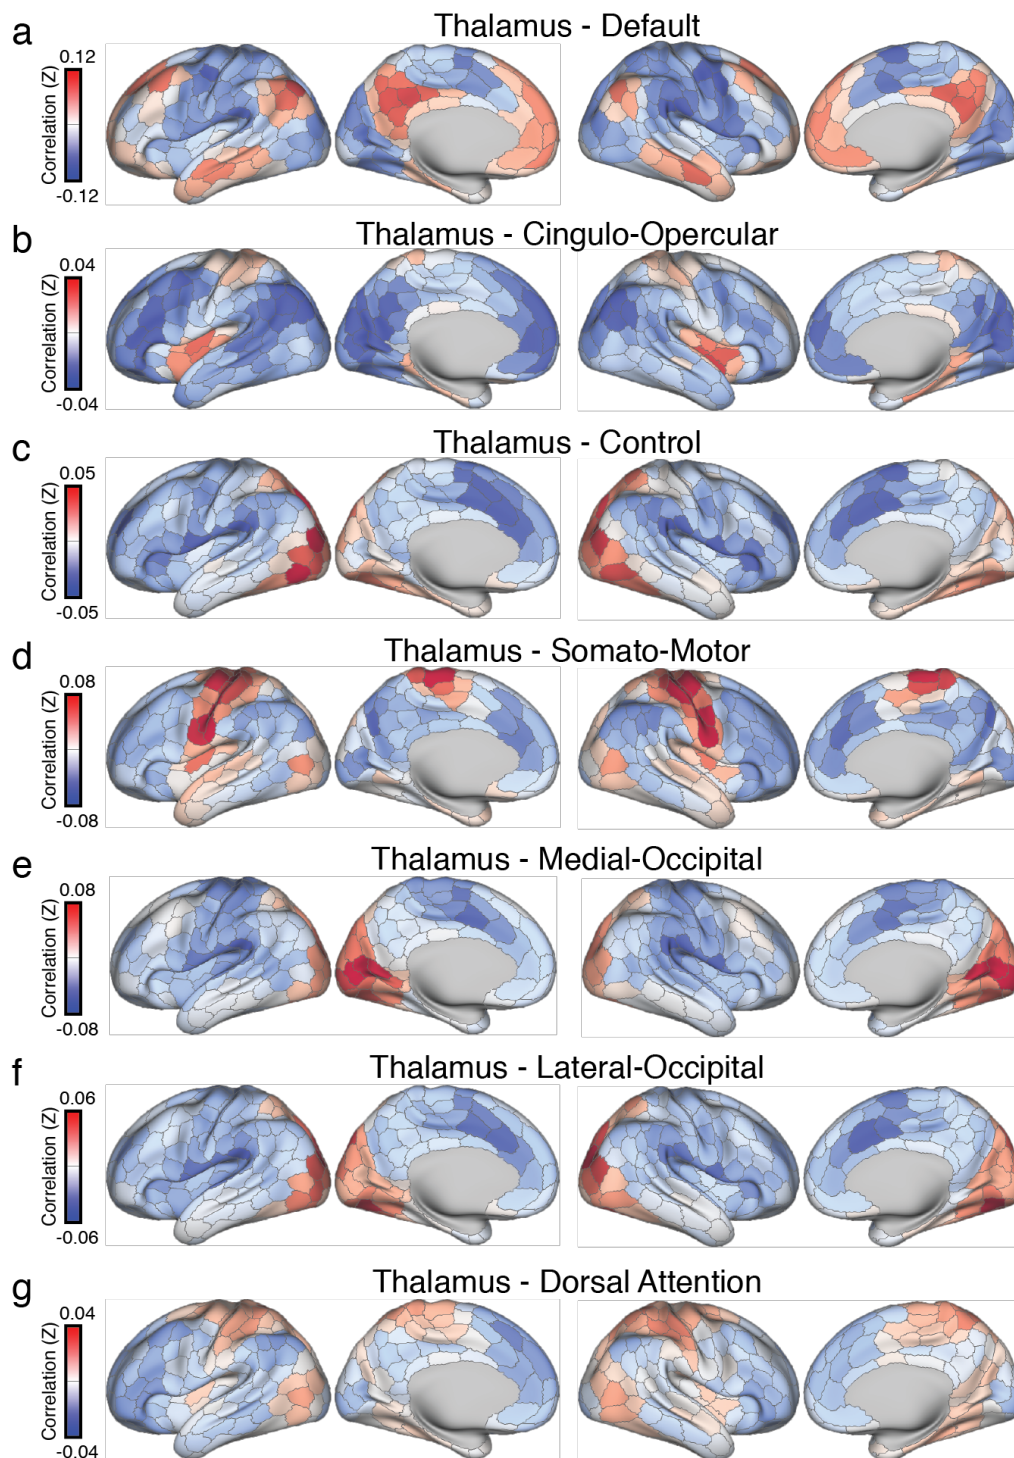

692

693 **Supplemental Figure 4.** Cortical resting-state functional correlation profile for each of the 6 thalamic  
694 parcels with analyzable AHBA expression data<sup>41</sup>. Averaged maps were calculated using data from 9,627  
695 participants from the UK Biobank.

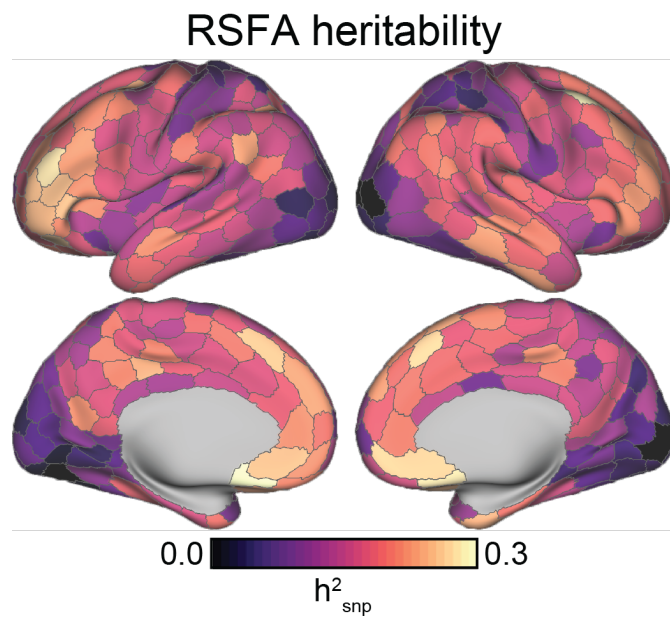

696

697 **Supplemental Figure 5.** SNP-wise heritability for each of the 400 bi-hemispheric cortical parcels from

698 Schaefer and colleagues<sup>47</sup>.

699

## References

- 700 1. Cajal, S. R. Y. *Recollections of my life*. Translated by Craigie E.H. (Garland Publishing, Inc, 1988).
- 701 2. Kepecs, A. & Fishell, G. Interneuron cell types are fit to function. *Nature* **505**, 318–326 (2014).
- 702 3. Markram, H. *et al.* Interneurons of the neocortical inhibitory system. *Nature Reviews Neuroscience*
- 703 **5**, 793–807 (2004).
- 704 4. Biswal, B. B. *et al.* Toward discovery science of human brain function. *Proc Natl Acad Sci USA*
- 705 **107**, 4734–4739 (2010).
- 706 5. Nakazawa, K. *et al.* GABAergic interneuron origin of schizophrenia pathophysiology.
- 707 *Neuropharmacology* **62**, 1574–1583 (2012).
- 708 6. Gonzalez-Burgos, G., Cho, R. Y. & Lewis, D. A. Alterations in cortical network oscillations and
- 709 parvalbumin neurons in schizophrenia. *Biological Psychiatry* **77**, 1031–1040 (2015).
- 710 7. Lin, L. C. & Sibille, E. Somatostatin, neuronal vulnerability and behavioral emotionality. *Molecular*
- 711 *Psychiatry* **20**, 377–387 (2015).
- 712 8. Richiardi, J. *et al.* Correlated gene expression supports synchronous activity in brain networks.
- 713 *Science* **348**, 1238–1241 (2015).
- 714 9. Anderson, K. M. *et al.* Gene expression links functional networks across cortex and striatum.
- 715 *Nature Communications* **9**, 1-14 (2018)
- 716 10. Krienen, F. M., Yeo, B. T. T., Ge, T., Buckner, R. L. & Sherwood, C. C. Transcriptional profiles of
- 717 supragranular-enriched genes associate with corticocortical network architecture in the human
- 718 brain. *Proc Natl Acad Sci USA* **113**, E469–E478 (2016).
- 719 11. Hawrylycz, M. *et al.* Canonical genetic signatures of the adult human brain. *Nat Neurosci* **18**,
- 720 1832–1844 (2015).
- 721 12. Burt, J. B. *et al.* Hierarchy of transcriptomic specialization across human cortex captured by
- 722 structural neuroimaging topography. *Nat Neurosci* **27**, 889–15 (2018).
- 723 13. Kim, Y. *et al.* Brain-wide maps reveal stereotyped cell-type- based cortical architecture and
- 724 subcortical sexual dimorphism. *Cell* **171**, 456–460.e22 (2017).
- 725 14. Hendry, S. H. C., Schwark, H. D., Jones, E. G. & Yan, J. Numbers and proportions of GABA-
- 726 immunoreactive neurons in different areas of monkey cerebral cortex. *The Journal of*
- 727 *Neuroscience* **7**, 1503–1519 (1987).
- 728 15. Douglas, R. J. & Martin, K. A. C. Mapping the matrix: The ways of neocortex. *Neuron* **56**, 226–238
- 729 (2007).
- 730 16. Kawaguchi, Y. & Kubota, Y. GABAergic cell subtypes and their synaptic connections in rat frontal
- 731 cortex. *Cerebral Cortex* **7**, 476–486 (1997).
- 732 17. Chaudhuri, R., Knoblauch, K., Gariel, M.-A., Kennedy, H. & Wang, X.-J. A large-scale circuit
- 733 mechanism for hierarchical dynamical processing in the primate cortex. *Neuron* **88**, 419–431
- 734 (2015).
- 735 18. Lee, J. H. *et al.* Global and local fMRI signals driven by neurons defined optogenetically by type
- 736 and wiring. *Nature* **465**, 788–792 (2010).
- 737 19. Sohal, V. S., Zhang, F., Yizhar, O. & Deisseroth, K. Parvalbumin neurons and gamma rhythms
- 738 enhance cortical circuit performance. *Nature* **459**, 698–702 (2009).
- 739 20. Cardin, J. A. *et al.* Driving fast-spiking cells induces gamma rhythm and controls sensory
- 740 responses. *Nature* **459**, 663–667 (2009).
- 741 21. Nir, Y. *et al.* Coupling between neuronal firing rate, gamma LFP, and BOLD fMRI is related to
- 742 interneuronal correlations. *Current Biology* **17**, 1275–1285 (2007).
- 743 22. Niessing, J. *et al.* Hemodynamic Signals Correlate Tightly with Synchronized Gamma Oscillations.
- 744 *Science* **309**, 958–951 (2005).
- 745 23. Shmuel, A. & Leopold, D. A. Neuronal correlates of spontaneous fluctuations in fMRI signals in
- 746 monkey visual cortex: Implications for functional connectivity at rest. *Hum. Brain Mapp.* **29**, 751–
- 747 761 (2008).
- 748 24. Schölvinck, M. L., Maier, A., Ye, F. Q., Duyn, J. H. & Leopold, D. A. Neural basis of global resting-
- 749 state fMRI activity. *Proc Natl Acad Sci USA* **107**, 10238–10243 (2010).
- 750 25. Magri, C., Schridde, U., Murayama, Y., Panzeri, S. & Logothetis, N. K. The amplitude and timing of
- 751 the BOLD signal reflects the relationship between local field potential power at different
- 752 frequencies. *The Journal of Neuroscience* **32**, 1395–1407 (2012).

- 753 26. Lewis, D. A., Curley, A. A., Glausier, J. R. & Volk, D. W. Cortical parvalbumin interneurons and  
754 cognitive dysfunction in schizophrenia. *Trends in Neurosciences* **35**, 57–67 (2012).
- 755 27. Miller, K. L. *et al.* Multimodal population brain imaging in the UK Biobank prospective  
756 epidemiological study. *Nat Neurosci* **19**, 1523–1536 (2016).
- 757 28. Mi, D. *et al.* Early emergence of cortical interneuron diversity in the mouse embryo. *Science* **360**,  
758 81–85 (2018).
- 759 29. Wamsley, B. & Fishell, G. Genetic and activity-dependent mechanisms underlying interneuron  
760 diversity. *Nature Reviews Neuroscience* **18**, 299–309 (2017).
- 761 30. Wonders, C. P. & Anderson, S. A. The origin and specification of cortical interneurons. *Nature*  
762 *Reviews Neuroscience* **7**, 687–696 (2006).
- 763 31. Fogarty, M. *et al.* Spatial genetic patterning of the embryonic neuroepithelium generates  
764 GABAergic interneuron diversity in the adult cortex. *Journal of Neuroscience* **27**, 10935–10946  
765 (2007).
- 766 32. Wonders, C. P. *et al.* A spatial bias for the origins of interneuron subgroups within the medial  
767 ganglionic eminence. *Developmental Biology* **314**, 127–136 (2008).
- 768 33. Hawrylycz, M. J. *et al.* An anatomically comprehensive atlas of the adult human brain  
769 transcriptome. *Nature* **489**, 391–399 (2012).
- 770 34. Bakken, T. E. *et al.* A comprehensive transcriptional map of primate brain development. *Nature*  
771 **535**, 367–375 (2016).
- 772 35. Sidman, R. L. & Rakic, P. Neuronal migration, with special reference to the developing human  
773 brain: A Review. *Brain Research* **62**, 1–35 (1973).
- 774 36. Letinic, K., Zoncu, R. & Rakic, P. Origin of GABAergic neurons in the human neocortex. *Nature*  
775 **417**, 645–649 (2002).
- 776 37. Fulcher, B. D. & Fornito, A. A transcriptional signature of hub connectivity in the mouse  
777 connectome. *Proc Natl Acad Sci USA* **113**, 1435–1440 (2016).
- 778 38. Buckner, R. L., Krienen, F. M. & Yeo, B. T. T. Opportunities and limitations of intrinsic functional  
779 connectivity MRI. *Nat Neurosci* **16**, 832–837 (2013).
- 780 39. Choi, E. Y., Yeo, B. T. T. & Buckner, R. L. The organization of the human striatum estimated by  
781 intrinsic functional connectivity. *Journal of Neurophysiology* **108**, 2242–2263 (2012).
- 782 40. Alexander, G. E., DeLong, M. R. & Strick, P. L. Parallel organization of functionally segregated  
783 circuits linking basal ganglia and cortex. *Annual Review of Neuroscience* **9**, 357–381 (1986).
- 784 41. Hwang, K., Bertolero, M. A., Liu, W. B. & D'Esposito, M. The human thalamus is an integrative hub  
785 for functional brain networks. *Journal of Neuroscience* **37**, 5594–5607 (2017).
- 786 42. Haber, S. N. & Knutson, B. The reward circuit: Linking primate anatomy and human imaging.  
787 *Neuropsychopharmacology* **35**, 4–26 (2009).
- 788 43. Menke, R. A., Jbabdi, S., Miller, K. L., Matthews, P. M. & Zarei, M. Connectivity-based  
789 segmentation of the substantia nigra in human and its implications in Parkinson's disease.  
790 *NeuroImage* **52**, 1175–1180 (2010).
- 791 44. Haber, S. N. The primate basal ganglia: parallel and integrative networks. *Journal of Chemical*  
792 *Neuroanatomy* **26**, 317–330 (2003).
- 793 45. Murray, J. D. *et al.* A hierarchy of intrinsic timescales across primate cortex. *Nat Neurosci* **17**,  
794 1661–1663 (2014).
- 795 46. Kannurpatti, S. S. & Biswal, B. B. Detection and scaling of task-induced fMRI-BOLD response  
796 using resting state fluctuations. *NeuroImage* **40**, 1567–1574 (2008).
- 797 47. Schaefer, A. *et al.* Local-global parcellation of the human cerebral cortex from intrinsic functional  
798 connectivity MRI. *Cerebral Cortex* **28**, 3095–3114 (2018).
- 799 48. Bijsterbosch, J. *et al.* Investigations into within- and between-subject resting-state amplitude  
800 variations. *NeuroImage* **159**, 57–69 (2017).
- 801 49. Yang, J., Lee, S. H., Goddard, M. E. & Visscher, P. M. GCTA: A tool for genome-wide complex  
802 trait analysis. *The American Journal of Human Genetics* **88**, 76–82 (2011).
- 803 50. Wang, G.-Z. *et al.* Correspondence between resting-state activity and brain gene expression.  
804 *Neuron* **88**, 659–666 (2015).
- 805 51. Visscher, P. M. *et al.* 10 years of GWAS discovery: biology, function, and translation. *The*  
806 *American Journal of Human Genetics* **101**, 5–22 (2017).
- 807 52. Stein, J. L. *et al.* Identification of common variants associated with human hippocampal and  
808 intracranial volumes. *Nat Genet* **44**, 552–561 (2012).

- 809 53. Skene, N. G. *et al.* Genetic identification of brain cell types underlying schizophrenia. *Nat Genet*  
810 **50**, 825–833 (2018).
- 811 54. Fromer, M. *et al.* Gene expression elucidates functional impact of polygenic risk for schizophrenia.  
812 *Nat Neurosci* **19**, 1442–1453 (2016).
- 813 55. Lonsdale, J. *et al.* The Genotype-Tissue Expression (GTEx) project. *Nat Genet* **45**, 580–585  
814 (2013).
- 815 56. Baker, J. T. *et al.* Disruption of cortical association networks in schizophrenia and psychotic  
816 bipolar disorder. *JAMA Psychiatry* **71**, 109–110 (2014).
- 817 57. Dienel, S. J. & Lewis, D. A. Alterations in cortical interneurons and cognitive function in  
818 schizophrenia. *Neurobiology of Disease* 1–11 (2018). doi:10.1016/j.nbd.2018.06.020
- 819 58. Schizophrenia Working Group of the Psychiatric Genomics Consortium. Biological insights from  
820 108 schizophrenia-associated genetic loci. *Nature* **511**, 421–427 (2014).
- 821 59. de Leeuw, C. A., Mooij, J. M., Heskes, T. & Posthuma, D. MAGMA: generalized gene-set analysis  
822 of GWAS data. *PLoS Comput Biol* **11**, e1004219–19 (2015).
- 823 60. Euesden, J., Lewis, C. M. & O'Reilly, P. F. PRSice: Polygenic risk score software. *Bioinformatics*  
824 **31**, 1466–1468 (2015).
- 825 61. Felleman, D. J. & Van Essen, D. C. Distributed Hierarchical Processing in the Primate Cerebral  
826 Cortex. *Cerebral Cortex* **1**, 1–47 (1991).
- 827 62. Muthukumaraswamy, S. D., Edden, R. A. E., Jones, D. K., Swettenham, J. B. & Singh, K. D.  
828 Resting GABA concentration predicts peak gamma frequency and fMRI amplitude in response to  
829 visual stimulation in humans. *Proc Natl Acad Sci USA* **106**, 8356–8361 (2009).
- 830 63. Sullivan, P. F., Kendler, K. S. & Neale, M. C. Schizophrenia as a complex trait: Evidence from a  
831 meta-analysis of twin studies. *Arch Gen Psychiatry* **60**, 1187–1192 (2003).
- 832 64. Uhlhaas, P. J. & Singer, W. Abnormal neural oscillations and synchrony in schizophrenia. *Nature*  
833 *Reviews Neuroscience* **11**, 100–113 (2010).
- 834 65. Akbarian, S. *et al.* Gene expression for glutamic acid decarboxylase is reduced without loss of  
835 neurons in prefrontal cortex of schizophrenics. *Arch Gen Psychiatry* **52**, 258–266 (1995).
- 836 66. Mauney, S. A. *et al.* Developmental pattern of perineuronal nets in the human prefrontal cortex  
837 and their deficit in schizophrenia. *Biological Psychiatry* **74**, 427–435 (2013).
- 838 67. Enwright, J. F. *et al.* Transcriptome alterations of prefrontal cortical parvalbumin neurons in  
839 schizophrenia. *Molecular Psychiatry* 1–8 (2017). doi:10.1038/mp.2017.216
- 840 68. Yanagi, M. *et al.* Kv3.1-containing K<sup>+</sup> channels are reduced in untreated schizophrenia and  
841 normalized with antipsychotic drugs. **19**, 573–579 (2013).
- 842 69. Marín, O. Interneuron dysfunction in psychiatric disorders. *Nature Reviews Neuroscience* **13**, 107–  
843 120 (2012).
- 844 70. Toker, L., Mancarci, B. O., Tripathy, S. & Pavlidis, P. Transcriptomic evidence for alterations in  
845 astrocytes and parvalbumin interneurons in subjects with bipolar disorder and schizophrenia.  
846 *Biological Psychiatry* 1–10 (2018). doi:10.1016/j.biopsych.2018.07.010
- 847 71. Fee, C., Banasr, M. & Sibille, E. Somatostatin-positive Gamma-Aminobutyric Acid interneuron  
848 deficits in depression: Cortical microcircuit and therapeutic perspectives. *Biological Psychiatry* **82**,  
849 549–559 (2017).
- 850 72. Fuchs, T. *et al.* Disinhibition of somatostatin-positive GABAergic interneurons results in an  
851 anxiolytic and antidepressant-like brain state. *Molecular Psychiatry* **22**, 920–930 (2016).
- 852 73. Schmaal, L. *et al.* Cortical abnormalities in adults and adolescents with major depression based on  
853 brain scans from 20 cohorts worldwide in the ENIGMA Major Depressive Disorder Working Group.  
854 *Molecular Psychiatry* **22**, 900–909 (2016).
- 855 74. Ducharme, S. *et al.* Anxious/depressed symptoms are linked to right ventromedial prefrontal  
856 cortical thickness maturation in healthy children and young adults. *Cerebral Cortex* **24**, 2941–2950  
857 (2014).
- 858 75. Holmes, A. J. *et al.* Individual differences in amygdala-medial prefrontal anatomy link negative  
859 affect, impaired social functioning, and polygenic depression risk. *Journal of Neuroscience* **32**,  
860 18087–18100 (2012).
- 861 76. Wolfe, C. J., Kohane, I. S. & Butte, A. J. Systematic survey reveals general applicability of 'guilt-  
862 by-association' within gene coexpression networks. *BMC Bioinformatics* **6**, 227–10 (2005).
- 863 77. Elliott, M. L. *et al.* A polygenic score for higher educational attainment is associated with larger  
864 brains. *Cerebral Cortex* **491**, 56–9 (2018).

- 865 78. Duncan, L. *et al.* Analysis of polygenic score usage and performance across diverse human  
866 populations. *bioRxiv* 1–21 (2018). doi:10.1101/398396
- 867 79. Ge, T., Holmes, A. J., Buckner, R. L., Smoller, J. W. & Sabuncu, M. R. Heritability analysis with  
868 repeat measurements and its application to resting-state functional connectivity. *Proc Natl Acad*  
869 *Sci USA* **114**, 5521–5526 (2017).
- 870 80. Colclough, G. L. *et al.* The heritability of multi-modal connectivity in human brain activity. *eLife*  
871 **e20178**, 1–27 (2017).
- 872 81. Romme, I. A. C., de Reus, M. A., Ophoff, R. A., Kahn, R. S. & van den Heuvel, M. P. Connectome  
873 disconnectivity and cortical gene expression in patients with schizophrenia. *Biological Psychiatry*  
874 **81**, 495–502 (2017).
- 875 82. Kvitsiani, D. *et al.* Distinct behavioural and network correlates of two interneuron types in  
876 prefrontal cortex. *Nature* **498**, 363–366 (2013).
- 877 83. Johnson, W. E., Li, C. & Rabinovic, A. Adjusting batch effects in microarray expression data using  
878 empirical Bayes methods. *Biostatistics* **8**, 118–127 (2006).
- 879 84. Romero-Garcia, R. *et al.* Structural covariance networks are coupled to expression of genes  
880 enriched in supragranular layers of the human cortex. *NeuroImage* **171**, 256–267 (2018).
- 881 85. Marcus, D. S. *et al.* Informatics and data mining tools and strategies for the Human Connectome  
882 Project. *Frontiers in Neuroinformatics* **5**, 1–12 (2011).
- 883 86. Jenkinson, M., Bannister, P., Brady, M. & Smith, S. Improved optimization for the robust and  
884 accurate linear registration and motion correction of brain images. *NeuroImage* **17**, 825–841  
885 (2002).
- 886 87. Beckmann, C. F. & Smith, S. M. Probabilistic independent component analysis for functional  
887 magnetic resonance imaging. *IEEE Trans. Med. Imaging* **23**, 137–152 (2004).
- 888 88. Cox, R. W. AFNI: Software for analysis and visualization of functional magnetic resonance  
889 neuroimages. *Computers and Biomedical Research* **29**, 162–173 (1996).
- 890 89. Purcell, S. *et al.* PLINK: A tool set for whole-genome association and population-based linkage  
891 analyses. *The American Journal of Human Genetics* **81**, 559–575 (2007).
- 892 90. Durinck, S. *et al.* BioMart and Bioconductor: a powerful link between biological databases and  
893 microarray data analysis. *Bioinformatics* **21**, 3439–3440 (2005).
